# Supplementary material
Source: MDPI journal article supplement (https://www.mdpi.com/1996-1073/12/16/3060)
Supplement: s1 [file s1]

## Sheet: Read me
MSC - Mushroom Spent Compost
	In this file data from MSC torrefaction experiments were collected.
	In the spreadsheet 'MSC Mositure' data of raw MSC biomass moisture were presented.
	In the spreadsheet 'Volatile Solids' data of produced biochar (under temperature between 200-300, oC with intervals of 20 oC, and residence time: 20, 40, and 60 minutes) and raw MSC biomass volatile solids content were presented.
	In the spreadsheet 'Ash' data of produced biochar (under temperature between 200-300, oC with intervals of 20 oC, and residence time: 20, 40, and 60 minutes) and raw MSC biomass ash content were presented.
	In the spreadsheet 'Higher Heating Value' data of produced biochar (under temperature between 200-300, oC with intervals of 20 oC, and residence time: 20, 40, and 60 minutes) and raw MSC biomass higher heating values were presented.
	In the spreadsheet 'TGA' data of torrefaction termogravimetric analysis (under temperature between 200-300, oC with intervals of 20 oC) were presented.

## Sheet: MSC Moisture
		Moisture, %	Mean of Moiture Value, %	Standard Deviation of Moisture Value, %
	Raw MSC biomass	61.5942	65.3156	4.52415
		68.3311
		60.6881
		71.395
		64.5698

## Sheet: Higher Heating Value
	Temperature, oC	Residence time, min.	Higher Heating Value, kJ/kg d.m.	Higher Heating Value, MJ/kg d.m.	Mean of Higher Heating Value, MJ/kg d.m.	Standard Deviation of Higher Heating Value, MJ/kg d.m.
	200	20	13869	13.869	14.0863	0.220048
		20	14309	14.309
		20	14081	14.081
		40	14341	14.341	14.3263	0.0128582
		40	14317	14.317
		40	14321	14.321
		60	14198	14.198	14.4253	0.229531
		60	14657	14.657
		60	14421	14.421
	220	20	14107	14.107	14.3763	0.38795
		20	14201	14.201
		20	14821	14.821
		40	16015	16.015	15.9447	0.0623886
		40	15896	15.896
		40	15923	15.923
		60	15620	15.62	15.916	0.293046
		60	16206	16.206
		60	15922	15.922
	240	20	14850	14.85	14.7837	0.0764875
		20	14700	14.7
		20	14801	14.801
		40	14365	14.365	14.613	0.244098
		40	14853	14.853
		40	14621	14.621
		60	14601	14.601	14.8097	0.2085
		60	15018	15.018
		60	14810	14.81
	260	20	15057	15.057	15.3337	0.283213
		20	15623	15.623
		20	15321	15.321
		40	15060	15.06	15.23	0.17152
		40	15403	15.403
		40	15227	15.227
		60	15473	15.473	15.557	0.0855395
		60	15644	15.644
		60	15554	15.554
	280	20	16752	16.752	16.888	0.121791
		20	16925	16.925
		20	16987	16.987
		40	16713	16.713	17.0793	0.617268
		40	16733	16.733
		40	17792	17.792
		60	17990	17.99	17.8823	0.132047
		60	17735	17.735
		60	17922	17.922
	300	20	16575	16.575	16.739	0.161084
		20	16897	16.897
		20	16745	16.745
		40	14060	14.06	14.6077	0.540643
		40	15141	15.141
		40	14622	14.622
		60	14274	14.274	14.2993	0.0752684
		60	14240	14.24
		60	14384	14.384
	Raw MSC biomass		14063	14.063	13.7873	0.504554
			13205	13.205
			14094	14.094

## Sheet: Volatile Solids
		Temperature, oC	Residence time, min.	Volitle Solids, % d.m.	Mean value of Volitle Solids, % d.m.	Standard Deviation of Volitle Solids, % d.m.
		200	20	68.0849	68.2105	0.24018
				68.0098
				67.9289
				68.3235
				68.544
				68.4454
				68.2334
				68.4288
				67.8962
			40	69.6427	69.1721	1.02414
				70.7367
				70.6982
				67.9221
				68.5996
				68.1443
				68.6632
				69.3595
				68.7827
			60	69.6664	69.3765	0.710016
				68.8361
				69.894
				70.5282
				68.869
				69.6278
				69.8589
				68.2747
				68.8331
		220	20	69.3992	69.264	0.796457
				69.4615
				69.3028
				67.5133
				70.6267
				69.4969
				69.1638
				69.3131
				69.0986
			40	75.505	75.7254	0.695043
				76.7301
				76.4458
				75.2595
				75.6162
				75.9084
				75.3827
				76.2379
				74.4428
			60	76.6753	75.8723	0.686365
				75.4403
				76.6242
				75.5445
				76.2939
				75.9475
				75.6036
				74.499
				76.2228
		240	20	70.5118	70.7345	1.16159
				71.6035
				70.7537
				68.6875
				70.9633
				73.001
				70.5438
				70.5441
				70.0019
			40	70.0361	69.5626	1.27647
				66.725
				69.3616
				69.0572
				70.408
				70.5308
				71.0723
				68.9364
				69.9362
			60	71.4473	69.0672	2.00697
				69.6081
				70.1447
				69.2509
				69.9872
				70.6838
				64.9582
				68.5754
				66.9493
		260	20	70.0652	69.7598	3.01378
				62.1186
				70.9512
				71.9467
				71.5685
				69.2544
				70.7971
				71.5856
			40	69.5507
				66.1304	68.6509	1.5527
				68.7587
				68.7127
				68.375
				68.5546
				71.7102
				69.3245
				69.2663
				67.0255
			60	69.8332	73.1203	10.1285
				68.2308
				68.8969
				70.4244
				69.8277
				69.5776
				99.9969
				69.4412
				71.854
		280		68.0222	69.5252	0.923751
				69.2619
				69.4812
				70.347
				70.8152
				69.4346
				70.2274
				69.8555
				68.2816
				69.3827	71.1543	1.30866
				69.3657
				69.571
				72.0671
				72.4735
				71.997
				72.0652
				71.9241
				71.5424
				68.1971	67.645	0.870656
				68.9063
				68.9603
				67.4149
				67.3746
				66.5713
				66.7467
				67.0547
				67.5787
		300	20	68.8384	72.313	10.4009
				69.5664
				69.165
				67.7492
				99.9968
				68.8741
				67.9862
				68.9889
				69.6519
			40	95.9554	64.3014	11.918
				60.9403
				58.7938
				60.703
				60.1916
				62.0223
				58.8621
				59.9153
				61.3291
			60	57.4363	57.4163	1.48818
				59.2761
				57.0242
				54.946
				56.6648
				57.9987
				55.694
				58.8886
				58.8178
		Raw MSC biomass		69.5998	71.599	2.30846
				74.1255
				71.0718

## Sheet: Ash
		Temperature, oC	Residence time, min.	Ash, % d.m.	Mean value of Ash, % d.m.	Standard Deviation of Ash, % d.m.
		200	20	31.9151	31.7895	0.24018
				31.9902
				32.0711
				31.6765
				31.456
				31.5546
				31.7666
				31.5712
				32.1038
			40	30.3573	30.8279	1.02414
				29.2633
				29.3018
				32.0779
				31.4004
				31.8557
				31.3368
				30.6405
				31.2173
			60	30.3336	30.6235	0.710016
				31.1639
				30.106
				29.4718
				31.131
				30.3722
				30.1411
				31.7253
				31.1669
		220	20	30.6008	30.736	0.796457
				30.5385
				30.6972
				32.4867
				29.3733
				30.5031
				30.8362
				30.6869
				30.9014
			40	24.495	24.2746	0.695043
				23.2699
				23.5542
				24.7405
				24.3838
				24.0916
				24.6173
				23.7621
				25.5572
			60	23.3247	24.1277	0.686365
				24.5597
				23.3758
				24.4555
				23.7061
				24.0525
				24.3964
				25.501
				23.7772
		240	20	29.4882	29.2655	1.16159
				28.3965
				29.2463
				31.3125
				29.0367
				26.999
				29.4562
				29.4559
				29.9981
			40	29.9639	30.4374	1.27647
				33.275
				30.6384
				30.9428
				29.592
				29.4692
				28.9277
				31.0636
				30.0638
			60	28.5527	30.9328	2.00697
				30.3919
				29.8553
				30.7491
				30.0128
				29.3162
				35.0418
				31.4246
				33.0507
		260	20	29.9348	30.2402	3.01378
				37.8814
				29.0488
				28.0533
				28.4315
				30.7456
				29.2029
				28.4144
			40	30.4493
				33.8696	31.3491	1.5527
				31.2413
				31.2873
				31.625
				31.4454
				28.2898
				30.6755
				30.7337
				32.9745
			60	30.1668	26.8797	10.1285
				31.7692
				31.1031
				29.5756
				30.1723
				30.4224
				0.00309338
				30.5588
				28.146
		280		31.9778	30.4748	0.923751
				30.7381
				30.5188
				29.653
				29.1848
				30.5654
				29.7726
				30.1445
				31.7184
				30.6173	28.8457	1.30866
				30.6343
				30.429
				27.9329
				27.5265
				28.003
				27.9348
				28.0759
				28.4576
				31.8029	32.355	0.870656
				31.0937
				31.0397
				32.5851
				32.6254
				33.4287
				33.2533
				32.9453
				32.4213
		300	20	31.1616	27.687	10.4009
				30.4336
				30.835
				32.2508
				0.00323415
				31.1259
				32.0138
				31.0111
				30.3481
			40	4.04457	35.6986	11.918
				39.0597
				41.2062
				39.297
				39.8084
				37.9777
				41.1379
				40.0847
				38.6709
			60	42.5637	42.5837	1.48818
				40.7239
				42.9758
				45.054
				43.3352
				42.0013
				44.306
				41.1114
				41.1822
		Raw MSC biomass		30.4002	28.401	2.30846
				25.8745
				28.9282

## Sheet: TGA
	Temperature, oC			Temperature, oC			Temperature, oC			Temperature, oC			Temperature, oC			Temperature, oC			Temperature, oC			Temperature, oC			Temperature, oC			Temperature, oC			Temperature, oC			Temperature, oC			Temperature, oC			Temperature, oC			Temperature, oC			Temperature, oC			Temperature, oC
	200	Repetition 1		200	Repetition 2		200	Repetition 3		220	Repetition 1		220	Repetition 2		220	Repetition 3		240	Repetition 1		240	Repetition 2		240	Repetition 3		260	Repetition 1		260	Repetition 2		260	Repetition 3		280	Repetition 1		280	Repetition 2		280	Repetition 3		300	Repetition 1		300
	Time of the torrefaction, s	Mass of MSC sample, g		Time of the torrefaction, s	Mass of MSC sample, g		Time of the torrefaction, s	Mass of MSC sample, g		Time of the torrefaction, s	Mass of MSC sample, g		Time of the torrefaction, s	Mass of MSC sample, g		Time of the torrefaction, s	Mass of MSC sample, g		Time of the torrefaction, s	Mass of MSC sample, g		Time of the torrefaction, s	Mass of MSC sample, g		Time of the torrefaction, s	Mass of MSC sample, g		Time of the torrefaction, s	Mass of MSC sample, g		Time of the torrefaction, s	Mass of MSC sample, g		Time of the torrefaction, s	Mass of MSC sample, g		Time of the torrefaction, s	Mass of MSC sample, g		Time of the torrefaction, s	Mass of MSC sample, g		Time of the torrefaction, s	Mass of MSC sample, g		Time of the torrefaction, s	Mass of MSC sample, g		Time of the torrefaction, s
	0	2.25		0	2.26		0	2.28		0	2.26		0	2.27		0	2.28		0	2.26		0	2.27		0	2.25		0	2.25		0	2.29		0	2.29		0	2.27		0	2.28		0	2.29		0	2.26		0
	10	2.24		10	2.26		10	2.28		10	2.25		11	2.27		10	2.28		11	2.26		10	2.27		10	2.25		10	2.24		10	2.28		10	2.28		10	2.26		11	2.27		11	2.28		10	2.26		10
	20	2.24		20	2.25		20	2.28		20	2.24		21	2.27		20	2.28		21	2.26		20	2.27		20	2.25		20	2.24		20	2.28		20	2.28		21	2.26		21	2.27		21	2.28		20	2.26		20
	30	2.25		30	2.26		30	2.28		30	2.24		31	2.27		30	2.28		31	2.26		31	2.27		30	2.25		30	2.23		30	2.29		31	2.28		31	2.26		31	2.27		31	2.29		30	2.26		30
	40	2.25		41	2.26		41	2.28		40	2.24		41	2.27		40	2.28		41	2.25		41	2.27		40	2.25		40	2.23		40	2.29		41	2.28		41	2.26		41	2.27		41	2.29		41	2.26		40
	50	2.25		51	2.26		51	2.28		50	2.23		51	2.27		50	2.28		51	2.25		51	2.27		50	2.25		50	2.23		50	2.29		51	2.28		51	2.26		51	2.27		51	2.28		51	2.26		50
	60	2.25		61	2.26		61	2.28		61	2.23		61	2.27		60	2.28		61	2.25		61	2.27		61	2.25		61	2.22		61	2.29		61	2.28		61	2.26		61	2.27		61	2.28		61	2.26		61
	71	2.25		71	2.26		71	2.28		71	2.23		71	2.27		71	2.28		71	2.25		71	2.27		71	2.25		71	2.22		71	2.29		71	2.28		71	2.26		71	2.27		71	2.28		71	2.25		71
	81	2.25		81	2.26		81	2.28		81	2.23		82	2.27		81	2.28		81	2.25		81	2.27		81	2.25		81	2.21		81	2.29		81	2.28		82	2.26		82	2.27		82	2.28		81	2.25		81
	91	2.25		91	2.25		91	2.28		91	2.22		92	2.27		91	2.28		92	2.25		91	2.27		91	2.25		91	2.21		91	2.28		91	2.28		92	2.26		92	2.27		92	2.28		91	2.25		91
	101	2.25		101	2.26		101	2.28		101	2.22		102	2.27		101	2.28		102	2.25		102	2.27		101	2.25		101	2.21		101	2.28		101	2.28		102	2.26		102	2.27		102	2.28		101	2.25		101
	111	2.25		112	2.25		112	2.28		111	2.22		112	2.27		111	2.28		112	2.25		112	2.27		111	2.25		111	2.2		111	2.28		112	2.28		112	2.26		112	2.27		112	2.28		112	2.25		111
	121	2.25		122	2.25		122	2.27		121	2.21		122	2.27		121	2.28		122	2.25		122	2.27		121	2.25		121	2.2		121	2.28		122	2.28		122	2.26		122	2.27		122	2.28		122	2.25		121
	131	2.25		132	2.25		132	2.27		132	2.21		132	2.27		131	2.28		132	2.24		132	2.27		132	2.25		132	2.2		132	2.28		132	2.28		132	2.26		132	2.27		132	2.28		132	2.25		131
	142	2.25		142	2.25		142	2.27		142	2.21		142	2.27		142	2.28		142	2.24		142	2.27		142	2.25		142	2.2		142	2.28		142	2.28		142	2.26		142	2.27		142	2.28		142	2.24		142
	152	2.25		152	2.25		152	2.27		152	2.21		153	2.27		152	2.28		153	2.24		152	2.27		152	2.25		152	2.2		152	2.28		152	2.28		152	2.26		153	2.27		153	2.28		152	2.24		152
	162	2.25		162	2.25		162	2.27		162	2.21		163	2.27		162	2.28		163	2.24		162	2.27		162	2.25		162	2.19		162	2.28		162	2.28		163	2.26		163	2.27		163	2.28		162	2.24		162
	172	2.25		172	2.25		172	2.27		172	2.21		173	2.27		172	2.28		173	2.24		173	2.27		172	2.25		172	2.19		172	2.28		172	2.28		173	2.26		173	2.27		173	2.28		172	2.24		172
	182	2.24		183	2.25		183	2.27		182	2.2		183	2.27		182	2.28		183	2.24		183	2.27		182	2.25		182	2.19		182	2.28		183	2.28		183	2.26		183	2.27		183	2.28		183	2.24		182
	192	2.24		193	2.25		193	2.27		192	2.2		193	2.27		192	2.28		193	2.24		193	2.27		192	2.25		192	2.19		192	2.28		193	2.28		193	2.26		193	2.27		193	2.28		193	2.23		192
	202	2.24		203	2.25		203	2.27		203	2.2		203	2.27		202	2.28		203	2.24		203	2.27		203	2.25		203	2.19		203	2.28		203	2.28		203	2.26		203	2.27		203	2.28		203	2.23		203
	213	2.24		213	2.25		213	2.27		213	2.2		213	2.27		213	2.28		213	2.23		213	2.27		213	2.25		213	2.19		213	2.28		213	2.28		213	2.25		213	2.27		214	2.28		213	2.23		213
	223	2.24		223	2.25		223	2.27		223	2.2		224	2.27		223	2.28		224	2.23		223	2.27		223	2.25		223	2.18		223	2.28		223	2.28		223	2.25		224	2.26		224	2.28		223	2.23		223
	233	2.24		233	2.25		233	2.27		233	2.2		234	2.27		233	2.28		234	2.23		233	2.27		233	2.25		233	2.18		233	2.28		233	2.28		234	2.25		234	2.26		234	2.27		233	2.23		233
	243	2.24		243	2.25		243	2.27		244	2.2		244	2.27		243	2.28		244	2.23		244	2.26		243	2.25		243	2.18		243	2.28		244	2.28		244	2.25		244	2.26		244	2.27		243	2.22		243
	253	2.24		254	2.25		254	2.27		254	2.2		254	2.27		253	2.28		254	2.23		254	2.26		253	2.24		253	2.18		253	2.28		254	2.28		254	2.25		254	2.26		254	2.27		254	2.22		253
	263	2.24		264	2.25		264	2.27		264	2.2		264	2.27		263	2.28		264	2.23		264	2.26		263	2.24		263	2.18		263	2.28		264	2.28		264	2.25		264	2.26		264	2.27		264	2.22		263
	273	2.24		274	2.25		274	2.27		274	2.2		274	2.27		273	2.28		274	2.23		274	2.26		274	2.24		274	2.18		274	2.28		274	2.28		274	2.25		274	2.26		274	2.27		274	2.22		274
	284	2.24		284	2.25		284	2.27		284	2.2		284	2.27		284	2.28		284	2.23		284	2.26		284	2.24		284	2.18		284	2.28		284	2.28		284	2.25		284	2.26		285	2.27		284	2.22		284
	294	2.24		294	2.25		294	2.26		294	2.2		295	2.27		294	2.28		295	2.22		294	2.26		294	2.24		294	2.18		294	2.28		294	2.28		294	2.25		295	2.26		295	2.27		294	2.21		294
	304	2.24		304	2.25		304	2.26		305	2.19		305	2.27		304	2.28		305	2.22		304	2.26		304	2.24		304	2.18		304	2.28		304	2.28		305	2.25		305	2.26		305	2.27		304	2.21		304
	314	2.24		314	2.25		314	2.26		315	2.19		315	2.27		314	2.28		315	2.22		315	2.26		314	2.24		314	2.18		314	2.27		315	2.28		315	2.25		315	2.26		315	2.27		314	2.21		314
	324	2.24		325	2.25		325	2.26		325	2.19		325	2.27		324	2.27		325	2.22		325	2.26		324	2.24		324	2.18		324	2.27		325	2.28		325	2.25		325	2.26		325	2.27		325	2.21		324
	334	2.24		335	2.25		335	2.26		335	2.19		335	2.27		334	2.27		335	2.22		335	2.26		334	2.24		335	2.18		335	2.27		335	2.28		335	2.25		335	2.26		335	2.27		335	2.21		334
	345	2.24		345	2.25		345	2.26		345	2.19		345	2.27		344	2.27		345	2.22		345	2.26		345	2.24		345	2.18		345	2.27		345	2.27		345	2.25		345	2.26		345	2.26		345	2.21		345
	355	2.24		355	2.25		355	2.26		355	2.19		355	2.27		355	2.27		355	2.22		355	2.26		355	2.24		355	2.17		355	2.27		355	2.27		355	2.24		355	2.26		356	2.26		355	2.2		355
	365	2.24		365	2.25		365	2.26		365	2.19		366	2.27		365	2.27		366	2.22		365	2.26		365	2.24		365	2.17		365	2.27		365	2.27		366	2.24		366	2.25		366	2.26		365	2.2		365
	375	2.24		375	2.24		375	2.26		376	2.19		376	2.27		375	2.27		376	2.22		375	2.26		375	2.24		375	2.17		375	2.27		375	2.27		376	2.24		376	2.25		376	2.26		375	2.2		375
	385	2.24		385	2.24		385	2.26		386	2.19		386	2.27		385	2.27		386	2.21		386	2.26		385	2.24		385	2.17		385	2.27		386	2.27		386	2.24		386	2.25		386	2.26		385	2.2		385
	395	2.24		396	2.24		396	2.26		396	2.19		396	2.27		395	2.27		396	2.21		396	2.26		395	2.24		395	2.17		395	2.27		396	2.27		396	2.24		396	2.25		396	2.26		396	2.2		395
	405	2.24		406	2.24		406	2.26		406	2.19		406	2.27		405	2.27		406	2.21		406	2.26		405	2.24		405	2.17		406	2.27		406	2.27		406	2.24		406	2.25		406	2.26		406	2.2		405
	416	2.24		416	2.24		416	2.26		416	2.19		416	2.27		415	2.27		416	2.21		416	2.26		416	2.24		416	2.17		416	2.27		416	2.27		416	2.24		416	2.25		416	2.26		416	2.19		416
	426	2.24		426	2.24		426	2.25		426	2.19		426	2.27		426	2.27		427	2.21		426	2.25		426	2.24		426	2.17		426	2.27		426	2.27		426	2.24		426	2.25		427	2.26		426	2.19		426
	436	2.24		436	2.24		436	2.25		436	2.19		437	2.27		436	2.27		437	2.21		436	2.25		436	2.24		436	2.17		436	2.27		436	2.27		437	2.24		437	2.25		437	2.26		436	2.19		436
	446	2.24		446	2.24		446	2.25		447	2.19		447	2.27		446	2.27		447	2.21		446	2.25		446	2.24		446	2.17		446	2.27		446	2.27		447	2.24		447	2.25		447	2.26		446	2.19		446
	456	2.24		456	2.24		456	2.25		457	2.19		457	2.27		456	2.27		457	2.21		457	2.25		456	2.24		456	2.17		456	2.27		457	2.27		457	2.24		457	2.25		457	2.25		456	2.19		456
	466	2.24		467	2.24		467	2.25		467	2.19		467	2.27		466	2.27		467	2.21		467	2.25		466	2.23		466	2.17		466	2.26		467	2.27		467	2.23		467	2.25		467	2.25		467	2.19		466
	476	2.24		477	2.24		477	2.25		477	2.19		477	2.27		476	2.27		477	2.2		477	2.25		476	2.23		476	2.16		477	2.26		477	2.27		477	2.23		477	2.25		477	2.25		477	2.19		476
	487	2.24		487	2.24		487	2.25		487	2.19		487	2.27		487	2.27		487	2.2		487	2.25		487	2.23		487	2.16		487	2.26		487	2.27		487	2.23		487	2.25		487	2.25		487	2.19		487
	497	2.24		497	2.24		497	2.25		497	2.19		497	2.27		497	2.27		498	2.2		497	2.25		497	2.23		497	2.16		497	2.26		497	2.27		497	2.23		497	2.24		498	2.25		497	2.19		497
	507	2.23		507	2.24		507	2.25		507	2.19		508	2.27		507	2.27		508	2.2		507	2.25		507	2.23		507	2.16		507	2.26		507	2.27		508	2.23		508	2.24		508	2.25		507	2.18		507
	517	2.23		517	2.24		517	2.25		518	2.19		518	2.26		517	2.27		518	2.2		517	2.25		517	2.23		517	2.16		517	2.26		517	2.26		518	2.23		518	2.24		518	2.25		517	2.18		517
	527	2.23		527	2.24		527	2.25		528	2.19		528	2.26		527	2.27		528	2.2		528	2.25		527	2.23		527	2.16		527	2.26		528	2.26		528	2.23		528	2.24		528	2.25		527	2.18		527
	537	2.23		538	2.24		538	2.25		538	2.19		538	2.26		537	2.27		538	2.2		538	2.25		537	2.23		537	2.16		537	2.26		538	2.26		538	2.23		538	2.24		538	2.25		538	2.18		537
	547	2.23		548	2.24		548	2.25		548	2.19		548	2.26		547	2.27		548	2.2		548	2.25		547	2.23		547	2.16		548	2.26		548	2.26		548	2.23		548	2.24		548	2.25		548	2.18		547
	558	2.23		558	2.24		558	2.24		558	2.19		558	2.26		558	2.27		558	2.2		558	2.25		558	2.23		558	2.16		558	2.26		558	2.26		558	2.23		558	2.24		558	2.25		558	2.18		558
	568	2.23		568	2.24		568	2.24		568	2.19		568	2.26		568	2.27		569	2.2		568	2.25		568	2.23		568	2.16		568	2.26		568	2.26		568	2.23		568	2.24		569	2.24		568	2.18		568
	578	2.23		578	2.24		578	2.24		579	2.19		579	2.26		578	2.27		579	2.2		578	2.25		578	2.23		578	2.16		578	2.26		578	2.26		579	2.22		579	2.24		579	2.24		578	2.18		578
	588	2.23		588	2.24		588	2.24		589	2.19		589	2.26		588	2.27		589	2.2		589	2.25		588	2.23		588	2.15		588	2.26		588	2.26		589	2.22		589	2.24		589	2.24		588	2.18		588
	598	2.23		598	2.24		598	2.24		599	2.19		599	2.26		598	2.27		599	2.19		599	2.24		598	2.23		598	2.15		598	2.26		599	2.26		599	2.22		599	2.24		599	2.24		598	2.17		598
	608	2.23		609	2.24		609	2.24		609	2.19		609	2.26		608	2.27		609	2.19		609	2.24		608	2.23		608	2.15		608	2.26		609	2.26		609	2.22		609	2.23		609	2.24		609	2.17		608
	618	2.23		619	2.24		619	2.24		619	2.19		619	2.26		618	2.27		619	2.19		619	2.24		618	2.23		618	2.15		619	2.25		619	2.26		619	2.22		619	2.23		619	2.24		619	2.17		618
	629	2.23		629	2.24		629	2.24		629	2.19		629	2.26		629	2.27		629	2.19		629	2.24		629	2.23		629	2.15		629	2.25		629	2.26		629	2.22		629	2.23		629	2.24		629	2.17		629
	639	2.23		639	2.24		639	2.24		639	2.19		639	2.26		639	2.26		640	2.19		639	2.24		639	2.23		639	2.15		639	2.25		639	2.26		639	2.22		639	2.23		640	2.24		639	2.17		639
	649	2.23		649	2.24		649	2.24		650	2.19		650	2.26		649	2.26		650	2.19		649	2.24		649	2.23		649	2.15		649	2.25		649	2.26		650	2.22		650	2.23		650	2.24		649	2.17		649
	659	2.23		659	2.24		659	2.24		660	2.19		660	2.26		659	2.26		660	2.19		660	2.24		659	2.23		659	2.15		659	2.25		660	2.26		660	2.22		660	2.23		660	2.24		659	2.17		659
	669	2.23		670	2.23		669	2.24		670	2.19		670	2.26		669	2.26		670	2.19		670	2.24		669	2.23		669	2.15		669	2.25		670	2.26		670	2.22		670	2.23		670	2.24		669	2.17		669
	679	2.23		680	2.23		680	2.24		680	2.19		680	2.26		679	2.26		680	2.19		680	2.24		679	2.23		679	2.15		679	2.25		680	2.26		680	2.22		680	2.23		680	2.23		680	2.17		679
	689	2.23		690	2.23		690	2.24		690	2.19		690	2.26		690	2.26		690	2.19		690	2.24		689	2.22		689	2.15		690	2.25		690	2.25		690	2.22		690	2.23		690	2.23		690	2.17		689
	699	2.23		700	2.23		700	2.24		700	2.19		700	2.26		700	2.26		700	2.19		700	2.24		700	2.22		700	2.15		700	2.25		700	2.25		700	2.21		700	2.23		700	2.23		700	2.17		700
	710	2.23		710	2.23		710	2.24		710	2.19		710	2.26		710	2.26		711	2.19		710	2.24		710	2.22		710	2.15		710	2.25		710	2.25		710	2.21		710	2.23		711	2.23		710	2.16		710
	720	2.23		720	2.23		720	2.23		721	2.19		721	2.26		720	2.26		721	2.19		720	2.24		720	2.22		720	2.14		720	2.25		720	2.25		721	2.21		721	2.23		721	2.23		720	2.16		720
	730	2.23		730	2.23		730	2.23		731	2.18		731	2.26		730	2.26		731	2.18		731	2.24		730	2.22		730	2.14		730	2.25		731	2.25		731	2.21		731	2.23		731	2.23		730	2.16		730
	740	2.23		741	2.23		740	2.23		741	2.18		741	2.26		740	2.26		741	2.18		741	2.24		740	2.22		740	2.14		740	2.25		741	2.25		741	2.21		741	2.22		741	2.23		740	2.16		740
	750	2.23		751	2.23		751	2.23		751	2.18		751	2.26		750	2.26		751	2.18		751	2.24		750	2.22		750	2.14		750	2.25		751	2.25		751	2.21		751	2.22		751	2.23		751	2.16		750
	760	2.23		761	2.23		761	2.23		761	2.18		761	2.26		760	2.26		761	2.18		761	2.24		760	2.22		760	2.14		761	2.25		761	2.25		761	2.21		761	2.22		761	2.23		761	2.16		760
	771	2.23		771	2.23		771	2.23		771	2.18		771	2.26		771	2.26		771	2.18		771	2.24		771	2.22		771	2.14		771	2.25		771	2.25		771	2.21		771	2.22		771	2.23		771	2.16		771
	781	2.23		781	2.23		781	2.23		781	2.18		781	2.26		781	2.26		782	2.18		781	2.24		781	2.22		781	2.14		781	2.25		781	2.25		781	2.21		781	2.22		782	2.23		781	2.16		781
	791	2.23		791	2.23		791	2.23		792	2.18		792	2.26		791	2.26		792	2.18		791	2.24		791	2.22		791	2.14		791	2.24		791	2.25		792	2.21		792	2.22		792	2.23		791	2.16		791
	801	2.23		801	2.23		801	2.23		802	2.18		802	2.26		801	2.26		802	2.18		802	2.24		801	2.22		801	2.14		801	2.24		802	2.25		802	2.21		802	2.22		802	2.23		801	2.16		801
	811	2.23		812	2.23		811	2.23		812	2.18		812	2.26		811	2.26		812	2.18		812	2.24		811	2.22		811	2.14		811	2.24		812	2.25		812	2.21		812	2.22		812	2.22		811	2.16		811
	821	2.23		822	2.23		822	2.23		822	2.18		822	2.26		821	2.26		822	2.18		822	2.23		821	2.22		821	2.14		821	2.24		822	2.25		822	2.21		822	2.22		822	2.22		822	2.15		821
	831	2.23		832	2.23		832	2.23		832	2.18		832	2.26		832	2.26		832	2.18		832	2.23		831	2.22		832	2.14		832	2.24		832	2.25		832	2.2		832	2.22		832	2.22		832	2.15		831
	841	2.23		842	2.23		842	2.23		842	2.18		842	2.26		842	2.26		842	2.18		842	2.23		842	2.22		842	2.14		842	2.24		842	2.25		842	2.2		842	2.22		842	2.22		842	2.15		842
	852	2.23		852	2.23		852	2.23		852	2.18		852	2.26		852	2.26		853	2.18		852	2.23		852	2.22		852	2.14		852	2.24		852	2.25		852	2.2		853	2.22		853	2.22		852	2.15		852
	862	2.23		862	2.23		862	2.23		863	2.18		863	2.25		862	2.26		863	2.18		862	2.23		862	2.22		862	2.14		862	2.24		862	2.25		863	2.2		863	2.22		863	2.22		862	2.15		862
	872	2.23		872	2.23		872	2.23		873	2.18		873	2.25		872	2.26		873	2.18		873	2.23		872	2.22		872	2.14		872	2.24		873	2.25		873	2.2		873	2.22		873	2.22		872	2.15		872
	882	2.23		883	2.23		882	2.23		883	2.18		883	2.25		882	2.26		883	2.18		883	2.23		882	2.22		882	2.13		882	2.24		883	2.25		883	2.2		883	2.21		883	2.22		882	2.15		882
	892	2.22		893	2.23		893	2.23		893	2.18		893	2.25		892	2.26		893	2.18		893	2.23		892	2.22		892	2.13		892	2.24		893	2.25		893	2.2		893	2.21		893	2.22		893	2.15		892
	902	2.22		903	2.23		903	2.23		903	2.18		903	2.25		903	2.26		903	2.18		903	2.23		902	2.22		903	2.13		903	2.24		903	2.24		903	2.2		903	2.21		903	2.22		903	2.15		902
	913	2.22		913	2.23		913	2.23		913	2.18		913	2.25		913	2.26		913	2.18		913	2.23		913	2.22		913	2.13		913	2.24		913	2.24		913	2.2		913	2.21		913	2.22		913	2.15		913
	923	2.22		923	2.23		923	2.22		923	2.18		923	2.25		923	2.26		924	2.18		923	2.23		923	2.22		923	2.13		923	2.24		923	2.24		923	2.2		924	2.21		924	2.22		923	2.15		923
	933	2.22		933	2.22		933	2.22		934	2.18		934	2.25		933	2.26		934	2.17		933	2.23		933	2.22		933	2.13		933	2.24		933	2.24		934	2.2		934	2.21		934	2.22		933	2.14		933
	943	2.22		943	2.22		943	2.22		944	2.18		944	2.25		943	2.26		944	2.17		944	2.23		943	2.22		943	2.13		943	2.24		944	2.24		944	2.2		944	2.21		944	2.22		943	2.14		943
	953	2.22		954	2.22		954	2.22		954	2.18		954	2.25		953	2.26		954	2.17		954	2.23		953	2.21		953	2.13		953	2.24		954	2.24		954	2.2		954	2.21		954	2.22		954	2.14		953
	963	2.22		964	2.22		964	2.22		964	2.18		964	2.25		963	2.26		964	2.17		964	2.23		963	2.21		964	2.13		963	2.24		964	2.24		964	2.2		964	2.21		964	2.21		964	2.14		963
	973	2.22		974	2.22		974	2.22		974	2.18		974	2.25		974	2.26		974	2.17		974	2.23		973	2.21		974	2.13		974	2.24		974	2.24		974	2.19		974	2.21		974	2.21		974	2.14		973
	984	2.22		984	2.22		984	2.22		984	2.18		984	2.25		984	2.26		984	2.17		984	2.23		984	2.21		984	2.13		984	2.24		984	2.24		984	2.19		984	2.21		984	2.21		984	2.14		984
	994	2.22		994	2.22		994	2.22		994	2.18		994	2.25		994	2.26		995	2.17		994	2.23		994	2.21		994	2.13		994	2.24		994	2.24		994	2.19		995	2.21		995	2.21		994	2.14		994
	1004	2.22		1004	2.22		1004	2.22		1005	2.18		1005	2.25		1004	2.26		1005	2.17		1004	2.23		1004	2.21		1004	2.13		1004	2.23		1005	2.24		1005	2.19		1005	2.21		1005	2.21		1004	2.14		1004
	1014	2.22		1014	2.22		1014	2.22		1015	2.18		1015	2.25		1014	2.26		1015	2.17		1015	2.23		1014	2.21		1014	2.13		1014	2.23		1015	2.24		1015	2.19		1015	2.21		1015	2.21		1014	2.14		1014
	1024	2.22		1025	2.22		1025	2.22		1025	2.18		1025	2.25		1024	2.26		1025	2.17		1025	2.23		1024	2.21		1024	2.13		1024	2.23		1025	2.24		1025	2.19		1025	2.21		1025	2.21		1025	2.14		1024
	1034	2.22		1035	2.22		1035	2.22		1035	2.18		1035	2.25		1034	2.26		1035	2.17		1035	2.23		1034	2.21		1035	2.13		1034	2.23		1035	2.24		1035	2.19		1035	2.2		1035	2.21		1035	2.14		1034
	1044	2.22		1045	2.22		1045	2.22		1045	2.18		1045	2.25		1045	2.25		1045	2.17		1045	2.23		1044	2.21		1045	2.13		1045	2.23		1045	2.24		1045	2.19		1045	2.2		1045	2.21		1045	2.14		1045
	1054	2.22		1055	2.22		1055	2.22		1055	2.18		1055	2.25		1055	2.25		1055	2.17		1055	2.23		1055	2.21		1055	2.13		1055	2.23		1055	2.24		1055	2.19		1055	2.2		1055	2.21		1055	2.13		1055
	1065	2.22		1065	2.22		1065	2.22		1065	2.18		1065	2.25		1065	2.25		1066	2.17		1065	2.23		1065	2.21		1065	2.13		1065	2.23		1065	2.24		1065	2.19		1066	2.2		1066	2.21		1065	2.13		1065
	1075	2.22		1075	2.22		1075	2.22		1076	2.18		1076	2.25		1075	2.25		1076	2.17		1075	2.23		1075	2.21		1075	2.13		1075	2.23		1076	2.24		1076	2.19		1076	2.2		1076	2.21		1075	2.13		1075
	1085	2.22		1085	2.22		1085	2.22		1086	2.18		1086	2.25		1085	2.25		1086	2.17		1086	2.23		1085	2.21		1085	2.13		1085	2.23		1086	2.24		1086	2.19		1086	2.2		1086	2.21		1085	2.13		1085
	1095	2.22		1096	2.22		1096	2.22		1096	2.18		1096	2.25		1095	2.25		1096	2.17		1096	2.23		1095	2.21		1095	2.13		1095	2.23		1096	2.24		1096	2.19		1096	2.2		1096	2.2		1096	2.13		1095
	1105	2.22		1106	2.22		1106	2.22		1106	2.18		1106	2.25		1105	2.25		1106	2.17		1106	2.22		1105	2.21		1106	2.13		1105	2.23		1106	2.24		1106	2.19		1106	2.2		1106	2.2		1106	2.13		1105
	1115	2.22		1116	2.22		1116	2.22		1116	2.17		1116	2.25		1116	2.25		1116	2.17		1116	2.22		1115	2.21		1116	2.13		1116	2.23		1116	2.24		1116	2.19		1116	2.2		1116	2.2		1116	2.13		1116
	1126	2.22		1126	2.22		1126	2.22		1126	2.17		1126	2.25		1126	2.25		1126	2.17		1126	2.22		1125	2.21		1126	2.13		1126	2.23		1126	2.24		1126	2.19		1126	2.2		1126	2.2		1126	2.13		1126
	1136	2.22		1136	2.22		1136	2.22		1136	2.17		1136	2.25		1136	2.25		1137	2.17		1136	2.22		1136	2.21		1136	2.13		1136	2.23		1136	2.24		1136	2.19		1137	2.2		1137	2.2		1136	2.13		1136
	1146	2.22		1146	2.22		1146	2.22		1147	2.17		1147	2.25		1146	2.25		1147	2.17		1146	2.22		1146	2.21		1146	2.13		1146	2.23		1147	2.24		1147	2.18		1147	2.2		1147	2.2		1146	2.13		1146
	1156	2.22		1156	2.22		1156	2.22		1157	2.17		1157	2.25		1156	2.25		1157	2.17		1157	2.22		1156	2.21		1156	2.13		1156	2.23		1157	2.23		1157	2.18		1157	2.2		1157	2.2		1156	2.13		1156
	1166	2.22		1167	2.22		1167	2.22		1167	2.17		1167	2.25		1166	2.25		1167	2.16		1167	2.22		1166	2.21		1166	2.13		1166	2.23		1167	2.23		1167	2.18		1167	2.2		1167	2.2		1167	2.13		1166
	1176	2.22		1177	2.22		1177	2.22		1177	2.17		1177	2.25		1176	2.25		1177	2.16		1177	2.22		1176	2.21		1177	2.13		1176	2.23		1177	2.23		1177	2.18		1177	2.2		1177	2.2		1177	2.12		1177
	1186	2.22		1187	2.22		1187	2.22		1187	2.17		1187	2.25		1187	2.25		1187	2.16		1187	2.22		1186	2.21		1187	2.13		1187	2.23		1187	2.23		1187	2.18		1187	2.2		1187	2.2		1187	2.12		1187
	1196	2.22		1197	2.22		1197	2.22		1197	2.17		1197	2.25		1197	2.25		1197	2.16		1197	2.22		1196	2.21		1197	2.13		1197	2.23		1197	2.23		1197	2.18		1197	2.19		1197	2.2		1197	2.12		1197
	1207	2.22		1207	2.22		1207	2.22		1207	2.17		1207	2.25		1207	2.25		1208	2.16		1207	2.22		1207	2.21		1207	2.13		1207	2.23		1207	2.23		1207	2.18		1208	2.19		1208	2.2		1207	2.12		1207
	1217	2.22		1217	2.22		1217	2.21		1218	2.17		1218	2.25		1217	2.25		1218	2.16		1217	2.22		1217	2.21		1217	2.13		1217	2.23		1218	2.23		1218	2.18		1218	2.19		1218	2.2		1217	2.12		1217
	1227	2.22		1227	2.21		1227	2.22		1228	2.17		1228	2.24		1227	2.25		1228	2.16		1228	2.22		1227	2.21		1227	2.13		1227	2.23		1228	2.23		1228	2.18		1228	2.19		1228	2.2		1228	2.12		1227
	1237	2.22		1238	2.21		1238	2.21		1238	2.17		1238	2.24		1237	2.25		1238	2.16		1238	2.22		1237	2.21		1238	2.13		1237	2.23		1238	2.23		1238	2.18		1238	2.19		1238	2.2		1238	2.12		1237
	1247	2.22		1248	2.21		1248	2.21		1248	2.17		1248	2.24		1247	2.25		1248	2.16		1248	2.22		1247	2.21		1248	2.13		1247	2.23		1248	2.23		1248	2.18		1248	2.19		1248	2.2		1248	2.12		1248
	1257	2.22		1258	2.21		1258	2.21		1258	2.17		1258	2.24		1258	2.25		1258	2.16		1258	2.22		1257	2.21		1258	2.13		1258	2.22		1258	2.23		1258	2.18		1258	2.19		1258	2.2		1258	2.12		1258
	1268	2.22		1268	2.21		1268	2.21		1268	2.17		1268	2.24		1268	2.25		1268	2.16		1268	2.22		1268	2.21		1268	2.13		1268	2.22		1268	2.23		1268	2.18		1268	2.19		1268	2.19		1268	2.12		1268
	1278	2.22		1278	2.21		1278	2.21		1278	2.17		1278	2.24		1278	2.25		1279	2.16		1278	2.22		1278	2.21		1278	2.13		1278	2.22		1278	2.23		1278	2.18		1279	2.19		1279	2.19		1278	2.12		1278
	1288	2.22		1288	2.21		1288	2.21		1289	2.17		1289	2.24		1288	2.25		1289	2.16		1288	2.22		1288	2.21		1288	2.12		1288	2.22		1289	2.23		1289	2.18		1289	2.19		1289	2.19		1288	2.12		1288
	1298	2.22		1298	2.21		1298	2.21		1299	2.17		1299	2.24		1298	2.25		1299	2.16		1299	2.22		1298	2.21		1298	2.12		1298	2.22		1299	2.23		1299	2.18		1299	2.19		1299	2.19		1298	2.11		1298
	1308	2.22		1309	2.21		1309	2.21		1309	2.17		1309	2.24		1308	2.25		1309	2.16		1309	2.22		1308	2.21		1308	2.12		1308	2.22		1309	2.23		1309	2.18		1309	2.19		1309	2.19		1309	2.11		1308
	1318	2.22		1319	2.21		1319	2.21		1319	2.17		1319	2.24		1318	2.25		1319	2.16		1319	2.22		1318	2.21		1319	2.12		1318	2.22		1319	2.23		1319	2.18		1319	2.19		1319	2.19		1319	2.11		1319
	1328	2.22		1329	2.21		1329	2.21		1329	2.17		1329	2.24		1329	2.25		1329	2.16		1329	2.22		1328	2.21		1329	2.12		1329	2.22		1329	2.23		1329	2.17		1329	2.19		1329	2.19		1329	2.11		1329
	1339	2.22		1339	2.21		1339	2.21		1339	2.17		1339	2.24		1339	2.25		1339	2.16		1339	2.22		1339	2.2		1339	2.12		1339	2.22		1339	2.23		1339	2.17		1339	2.19		1340	2.19		1339	2.11		1339
	1349	2.22		1349	2.21		1349	2.21		1349	2.17		1349	2.24		1349	2.25		1350	2.16		1349	2.22		1349	2.2		1349	2.12		1349	2.22		1349	2.23		1349	2.17		1350	2.19		1350	2.19		1349	2.11		1349
	1359	2.22		1359	2.21		1359	2.21		1360	2.17		1360	2.24		1359	2.25		1360	2.16		1359	2.22		1359	2.2		1359	2.12		1359	2.22		1360	2.23		1360	2.17		1360	2.19		1360	2.19		1359	2.11		1359
	1369	2.22		1369	2.21		1369	2.21		1370	2.17		1370	2.24		1369	2.25		1370	2.16		1370	2.22		1369	2.2		1369	2.12		1369	2.22		1370	2.23		1370	2.17		1370	2.19		1370	2.19		1369	2.11		1369
	1379	2.22		1380	2.21		1380	2.21		1380	2.17		1380	2.24		1379	2.25		1380	2.16		1380	2.22		1379	2.2		1380	2.12		1379	2.22		1380	2.23		1380	2.17		1380	2.18		1380	2.19		1380	2.11		1379
	1389	2.22		1390	2.21		1390	2.21		1390	2.17		1390	2.24		1389	2.25		1390	2.16		1390	2.22		1389	2.2		1390	2.12		1390	2.22		1390	2.23		1390	2.17		1390	2.18		1390	2.19		1390	2.11		1390
	1399	2.22		1400	2.21		1400	2.21		1400	2.17		1400	2.24		1400	2.25		1400	2.16		1400	2.22		1399	2.2		1400	2.12		1400	2.22		1400	2.23		1400	2.17		1400	2.18		1400	2.19		1400	2.11		1400
	1410	2.22		1410	2.21		1410	2.21		1410	2.17		1410	2.24		1410	2.25		1410	2.16		1410	2.22		1410	2.2		1410	2.12		1410	2.22		1410	2.23		1410	2.17		1410	2.18		1411	2.19		1410	2.11		1410
	1420	2.22		1420	2.21		1420	2.21		1420	2.17		1420	2.24		1420	2.25		1421	2.16		1420	2.22		1420	2.2		1420	2.12		1420	2.22		1420	2.23		1421	2.17		1421	2.18		1421	2.19		1420	2.1		1420
	1430	2.22		1430	2.21		1430	2.21		1431	2.17		1431	2.24		1430	2.25		1431	2.16		1430	2.22		1430	2.2		1430	2.12		1430	2.22		1431	2.23		1431	2.17		1431	2.18		1431	2.19		1430	2.1		1430
	1440	2.22		1440	2.21		1440	2.21		1441	2.17		1441	2.24		1440	2.25		1441	2.16		1441	2.22		1440	2.2		1440	2.12		1440	2.22		1441	2.23		1441	2.17		1441	2.18		1441	2.19		1440	2.1		1440
	1450	2.22		1451	2.21		1451	2.21		1451	2.17		1451	2.24		1450	2.25		1451	2.16		1451	2.22		1450	2.2		1451	2.12		1450	2.22		1451	2.23		1451	2.17		1451	2.18		1451	2.19		1451	2.1		1450
	1460	2.22		1461	2.21		1461	2.21		1461	2.17		1461	2.24		1460	2.25		1461	2.16		1461	2.22		1460	2.2		1461	2.12		1460	2.22		1461	2.23		1461	2.17		1461	2.18		1461	2.18		1461	2.1		1461
	1470	2.22		1471	2.21		1471	2.21		1471	2.17		1471	2.24		1471	2.25		1471	2.16		1471	2.22		1470	2.2		1471	2.12		1471	2.22		1471	2.23		1471	2.17		1471	2.18		1471	2.18		1471	2.1		1471
	1481	2.22		1481	2.21		1481	2.21		1481	2.17		1481	2.24		1481	2.25		1481	2.16		1481	2.22		1481	2.2		1481	2.12		1481	2.22		1481	2.23		1481	2.17		1482	2.18		1482	2.18		1481	2.1		1481
	1491	2.22		1491	2.21		1491	2.21		1491	2.17		1491	2.24		1491	2.25		1492	2.16		1491	2.22		1491	2.2		1491	2.12		1491	2.22		1491	2.23		1491	2.17		1492	2.18		1492	2.18		1491	2.1		1491
	1501	2.22		1501	2.21		1501	2.21		1502	2.17		1502	2.24		1501	2.25		1502	2.15		1501	2.22		1501	2.2		1501	2.12		1501	2.22		1502	2.23		1502	2.17		1502	2.18		1502	2.18		1501	2.1		1501
	1511	2.22		1511	2.21		1511	2.21		1512	2.17		1512	2.24		1511	2.25		1512	2.15		1512	2.22		1511	2.2		1511	2.12		1511	2.22		1512	2.23		1512	2.17		1512	2.18		1512	2.18		1511	2.1		1511
	1521	2.22		1522	2.21		1522	2.21		1522	2.17		1522	2.24		1521	2.25		1522	2.15		1522	2.22		1521	2.2		1522	2.12		1521	2.22		1522	2.23		1522	2.17		1522	2.18		1522	2.18		1522	2.1		1522
	1531	2.22		1532	2.21		1532	2.21		1532	2.17		1532	2.24		1531	2.25		1532	2.15		1532	2.21		1531	2.2		1532	2.12		1531	2.22		1532	2.22		1532	2.17		1532	2.18		1532	2.18		1532	2.1		1532
	1541	2.22		1542	2.21		1542	2.21		1542	2.17		1542	2.24		1542	2.25		1542	2.15		1542	2.22		1541	2.2		1542	2.12		1542	2.22		1542	2.22		1542	2.17		1542	2.18		1542	2.18		1542	2.09		1542
	1552	2.22		1552	2.21		1552	2.21		1552	2.17		1552	2.24		1552	2.25		1553	2.15		1552	2.21		1552	2.2		1552	2.12		1552	2.22		1552	2.22		1552	2.16		1553	2.18		1553	2.18		1552	2.09		1552
	1562	2.22		1562	2.21		1562	2.21		1562	2.17		1562	2.24		1562	2.25		1563	2.15		1562	2.21		1562	2.2		1562	2.12		1562	2.22		1562	2.22		1562	2.16		1563	2.18		1563	2.18		1562	2.09		1562
	1572	2.22		1572	2.21		1572	2.2		1573	2.17		1573	2.24		1572	2.25		1573	2.15		1572	2.21		1572	2.2		1572	2.12		1572	2.22		1573	2.22		1573	2.16		1573	2.18		1573	2.18		1572	2.09		1572
	1582	2.21		1583	2.21		1583	2.2		1583	2.17		1583	2.24		1582	2.25		1583	2.15		1583	2.21		1582	2.2		1582	2.12		1582	2.21		1583	2.22		1583	2.16		1583	2.18		1583	2.18		1582	2.09		1582
	1592	2.22		1593	2.21		1593	2.2		1593	2.17		1593	2.24		1592	2.25		1593	2.15		1593	2.21		1592	2.2		1593	2.12		1592	2.21		1593	2.22		1593	2.16		1593	2.17		1593	2.18		1593	2.09		1593
	1602	2.22		1603	2.21		1603	2.2		1603	2.17		1603	2.24		1603	2.25		1603	2.15		1603	2.21		1602	2.2		1603	2.12		1602	2.21		1603	2.22		1603	2.16		1603	2.17		1603	2.18		1603	2.09		1603
	1612	2.21		1613	2.21		1613	2.2		1613	2.17		1613	2.24		1613	2.25		1613	2.15		1613	2.21		1612	2.2		1613	2.12		1613	2.21		1613	2.22		1613	2.16		1613	2.17		1613	2.18		1613	2.09		1613
	1623	2.21		1623	2.21		1623	2.2		1623	2.17		1623	2.24		1623	2.25		1624	2.15		1623	2.21		1623	2.2		1623	2.12		1623	2.21		1623	2.22		1623	2.16		1624	2.17		1624	2.18		1623	2.09		1623
	1633	2.21		1633	2.21		1633	2.2		1633	2.17		1633	2.24		1633	2.25		1634	2.15		1633	2.21		1633	2.2		1633	2.12		1633	2.21		1633	2.22		1634	2.16		1634	2.17		1634	2.18		1633	2.09		1633
	1643	2.21		1643	2.21		1643	2.2		1644	2.17		1644	2.24		1643	2.25		1644	2.15		1643	2.21		1643	2.2		1643	2.12		1643	2.21		1644	2.22		1644	2.16		1644	2.17		1644	2.18		1643	2.09		1643
	1653	2.21		1654	2.21		1653	2.2		1654	2.17		1654	2.24		1653	2.25		1654	2.15		1654	2.21		1653	2.2		1653	2.12		1653	2.21		1654	2.22		1654	2.16		1654	2.17		1654	2.18		1654	2.09		1653
	1663	2.21		1664	2.21		1664	2.2		1664	2.17		1664	2.24		1663	2.25		1664	2.15		1664	2.21		1663	2.2		1664	2.12		1663	2.21		1664	2.22		1664	2.16		1664	2.17		1664	2.18		1664	2.09		1664
	1673	2.21		1674	2.21		1674	2.2		1674	2.17		1674	2.24		1674	2.25		1674	2.15		1674	2.21		1673	2.2		1674	2.11		1674	2.21		1674	2.22		1674	2.16		1674	2.17		1674	2.17		1674	2.08		1674
	1683	2.21		1684	2.21		1684	2.2		1684	2.17		1684	2.24		1684	2.25		1684	2.15		1684	2.21		1683	2.2		1684	2.11		1684	2.21		1684	2.22		1684	2.16		1684	2.17		1684	2.17		1684	2.08		1684
	1694	2.21		1694	2.21		1694	2.2		1694	2.17		1694	2.24		1694	2.25		1695	2.15		1694	2.21		1694	2.2		1694	2.11		1694	2.21		1694	2.22		1694	2.16		1695	2.17		1695	2.17		1694	2.08		1694
	1704	2.21		1704	2.21		1704	2.2		1704	2.17		1705	2.24		1704	2.25		1705	2.15		1704	2.21		1704	2.2		1704	2.11		1704	2.21		1704	2.22		1705	2.16		1705	2.17		1705	2.17		1704	2.08		1704
	1714	2.21		1714	2.21		1714	2.2		1715	2.17		1715	2.24		1714	2.25		1715	2.15		1714	2.21		1714	2.2		1714	2.11		1714	2.21		1715	2.22		1715	2.16		1715	2.17		1715	2.17		1715	2.08		1714
	1724	2.21		1725	2.21		1725	2.2		1725	2.17		1725	2.24		1724	2.25		1725	2.15		1725	2.21		1724	2.2		1724	2.11		1724	2.21		1725	2.22		1725	2.16		1725	2.17		1725	2.17		1725	2.08		1725
	1734	2.21		1735	2.21		1735	2.2		1735	2.17		1735	2.24		1734	2.25		1735	2.15		1735	2.21		1734	2.2		1735	2.11		1734	2.21		1735	2.22		1735	2.16		1735	2.17		1735	2.17		1735	2.08		1735
	1744	2.21		1745	2.21		1745	2.2		1745	2.17		1745	2.24		1745	2.25		1745	2.15		1745	2.21		1744	2.2		1745	2.11		1745	2.21		1745	2.22		1745	2.16		1745	2.17		1745	2.17		1745	2.08		1745
	1754	2.21		1755	2.2		1755	2.2		1755	2.17		1755	2.24		1755	2.25		1755	2.15		1755	2.21		1754	2.2		1755	2.11		1755	2.21		1755	2.22		1755	2.16		1755	2.17		1755	2.17		1755	2.08		1755
	1765	2.21		1765	2.21		1765	2.2		1765	2.17		1765	2.24		1765	2.25		1766	2.15		1765	2.21		1765	2.2		1765	2.11		1765	2.21		1765	2.22		1765	2.16		1766	2.17		1766	2.17		1765	2.08		1765
	1775	2.21		1775	2.2		1775	2.2		1775	2.17		1775	2.24		1775	2.25		1776	2.15		1775	2.21		1775	2.2		1775	2.11		1775	2.21		1775	2.22		1776	2.16		1776	2.17		1776	2.17		1775	2.08		1775
	1785	2.21		1785	2.2		1785	2.2		1786	2.17		1786	2.24		1785	2.25		1786	2.15		1785	2.21		1785	2.2		1785	2.11		1785	2.21		1786	2.22		1786	2.16		1786	2.17		1786	2.17		1786	2.08		1785
	1795	2.21		1796	2.2		1796	2.2		1796	2.17		1796	2.24		1795	2.25		1796	2.15		1796	2.21		1795	2.2		1795	2.11		1795	2.21		1796	2.22		1796	2.16		1796	2.17		1796	2.17		1796	2.08		1796
	1805	2.21		1806	2.2		1806	2.2		1806	2.17		1806	2.24		1805	2.25		1806	2.15		1806	2.21		1805	2.2		1806	2.11		1805	2.21		1806	2.22		1806	2.15		1806	2.17		1806	2.17		1806	2.08		1806
	1815	2.21		1816	2.2		1816	2.2		1816	2.17		1816	2.24		1816	2.25		1816	2.15		1816	2.21		1815	2.2		1816	2.11		1816	2.21		1816	2.22		1816	2.15		1816	2.17		1816	2.17		1816	2.07		1816
	1825	2.21		1826	2.2		1826	2.2		1826	2.17		1826	2.24		1826	2.25		1826	2.15		1826	2.21		1825	2.2		1826	2.11		1826	2.21		1826	2.22		1826	2.15		1826	2.16		1826	2.17		1826	2.07		1826
	1836	2.21		1836	2.2		1836	2.2		1836	2.17		1836	2.24		1836	2.25		1837	2.15		1836	2.21		1836	2.2		1836	2.11		1836	2.21		1836	2.22		1836	2.15		1837	2.16		1837	2.17		1836	2.07		1836
	1846	2.21		1846	2.2		1846	2.2		1846	2.17		1846	2.23		1846	2.25		1847	2.15		1846	2.21		1846	2.2		1846	2.11		1846	2.21		1846	2.22		1847	2.15		1847	2.16		1847	2.17		1846	2.07		1846
	1856	2.21		1856	2.2		1856	2.2		1857	2.17		1857	2.24		1856	2.25		1857	2.15		1856	2.21		1856	2.2		1856	2.11		1856	2.21		1857	2.22		1857	2.15		1857	2.16		1857	2.17		1857	2.07		1856
	1866	2.21		1867	2.2		1867	2.2		1867	2.17		1867	2.24		1866	2.25		1867	2.15		1867	2.21		1866	2.2		1866	2.11		1866	2.21		1867	2.22		1867	2.15		1867	2.16		1867	2.17		1867	2.07		1867
	1876	2.21		1877	2.2		1877	2.2		1877	2.17		1877	2.23		1876	2.25		1877	2.15		1877	2.21		1876	2.2		1877	2.11		1876	2.21		1877	2.22		1877	2.15		1877	2.16		1877	2.17		1877	2.07		1877
	1886	2.21		1887	2.2		1887	2.2		1887	2.17		1887	2.24		1887	2.25		1887	2.15		1887	2.21		1886	2.2		1887	2.11		1887	2.21		1887	2.22		1887	2.15		1887	2.16		1887	2.17		1887	2.07		1887
	1897	2.21		1897	2.2		1897	2.2		1897	2.17		1897	2.23		1897	2.25		1897	2.15		1897	2.21		1896	2.2		1897	2.11		1897	2.21		1897	2.22		1897	2.15		1897	2.16		1897	2.17		1897	2.07		1897
	1907	2.21		1907	2.2		1907	2.2		1907	2.17		1907	2.23		1907	2.25		1908	2.15		1907	2.21		1907	2.2		1907	2.11		1907	2.21		1907	2.22		1907	2.15		1908	2.16		1908	2.16		1907	2.07		1907
	1917	2.21		1917	2.2		1917	2.2		1917	2.17		1917	2.23		1917	2.25		1918	2.15		1917	2.21		1917	2.2		1917	2.11		1917	2.21		1917	2.22		1918	2.15		1918	2.16		1918	2.16		1917	2.07		1917
	1927	2.21		1928	2.2		1927	2.2		1928	2.17		1928	2.23		1927	2.25		1928	2.15		1927	2.21		1927	2.19		1927	2.11		1927	2.21		1928	2.22		1928	2.15		1928	2.16		1928	2.16		1928	2.07		1927
	1937	2.21		1938	2.2		1938	2.2		1938	2.16		1938	2.23		1937	2.25		1938	2.15		1938	2.21		1937	2.19		1937	2.11		1937	2.2		1938	2.22		1938	2.15		1938	2.16		1938	2.16		1938	2.07		1938
	1947	2.21		1948	2.2		1948	2.2		1948	2.16		1948	2.23		1947	2.25		1948	2.15		1948	2.21		1947	2.19		1948	2.11		1947	2.2		1948	2.22		1948	2.15		1948	2.16		1948	2.16		1948	2.07		1948
	1957	2.21		1958	2.2		1958	2.2		1958	2.16		1958	2.23		1958	2.25		1958	2.15		1958	2.21		1957	2.19		1958	2.11		1958	2.2		1958	2.22		1958	2.15		1958	2.16		1958	2.16		1958	2.07		1958
	1968	2.21		1968	2.2		1968	2.2		1968	2.16		1968	2.23		1968	2.25		1969	2.15		1968	2.21		1967	2.19		1968	2.11		1968	2.2		1968	2.22		1968	2.15		1968	2.16		1968	2.16		1968	2.07		1968
	1978	2.21		1978	2.2		1978	2.2		1978	2.16		1978	2.23		1978	2.25		1979	2.15		1978	2.21		1978	2.19		1978	2.11		1978	2.2		1978	2.22		1978	2.15		1979	2.16		1979	2.16		1978	2.06		1978
	1988	2.21		1988	2.2		1988	2.2		1988	2.16		1989	2.23		1988	2.25		1989	2.15		1988	2.21		1988	2.19		1988	2.11		1988	2.2		1989	2.22		1989	2.15		1989	2.16		1989	2.16		1988	2.06		1988
	1998	2.21		1999	2.2		1998	2.2		1999	2.16		1999	2.23		1998	2.25		1999	2.15		1998	2.21		1998	2.19		1998	2.11		1998	2.2		1999	2.22		1999	2.15		1999	2.16		1999	2.16		1999	2.06		1998
	2008	2.21		2009	2.2		2009	2.2		2009	2.16		2009	2.23		2008	2.25		2009	2.14		2009	2.21		2008	2.19		2008	2.11		2008	2.2		2009	2.22		2009	2.15		2009	2.16		2009	2.16		2009	2.06		2009
	2018	2.21		2019	2.2		2019	2.2		2019	2.16		2019	2.23		2018	2.25		2019	2.14		2019	2.21		2018	2.19		2019	2.11		2018	2.2		2019	2.21		2019	2.15		2019	2.16		2019	2.16		2019	2.06		2019
	2028	2.21		2029	2.2		2029	2.2		2029	2.16		2029	2.23		2029	2.25		2029	2.14		2029	2.21		2028	2.19		2029	2.11		2029	2.2		2029	2.21		2029	2.15		2029	2.16		2029	2.16		2029	2.06		2029
	2039	2.21		2039	2.2		2039	2.2		2039	2.16		2039	2.23		2039	2.25		2040	2.14		2039	2.21		2038	2.19		2039	2.11		2039	2.2		2039	2.21		2039	2.15		2039	2.16		2039	2.16		2039	2.06		2039
	2049	2.21		2049	2.2		2049	2.2		2049	2.16		2049	2.23		2049	2.25		2050	2.14		2049	2.21		2049	2.19		2049	2.11		2049	2.2		2049	2.21		2050	2.15		2050	2.16		2050	2.16		2049	2.06		2049
	2059	2.21		2059	2.2		2059	2.2		2059	2.16		2060	2.23		2059	2.25		2060	2.14		2059	2.21		2059	2.19		2059	2.11		2059	2.2		2060	2.21		2060	2.15		2060	2.16		2060	2.16		2060	2.06		2059
	2069	2.21		2070	2.2		2069	2.2		2070	2.16		2070	2.23		2069	2.25		2070	2.14		2069	2.21		2069	2.19		2069	2.1		2069	2.2		2070	2.21		2070	2.15		2070	2.16		2070	2.16		2070	2.06		2069
	2079	2.21		2080	2.2		2080	2.2		2080	2.16		2080	2.23		2079	2.25		2080	2.14		2080	2.21		2079	2.19		2079	2.1		2079	2.2		2080	2.21		2080	2.15		2080	2.16		2080	2.16		2080	2.06		2080
	2089	2.21		2090	2.2		2090	2.2		2090	2.16		2090	2.23		2089	2.25		2090	2.14		2090	2.21		2089	2.19		2090	2.1		2089	2.2		2090	2.21		2090	2.15		2090	2.15		2090	2.16		2090	2.06		2090
	2099	2.21		2100	2.2		2100	2.2		2100	2.16		2100	2.23		2100	2.25		2100	2.14		2100	2.21		2099	2.19		2100	2.1		2100	2.2		2100	2.21		2100	2.15		2100	2.15		2100	2.16		2100	2.06		2100
	2110	2.21		2110	2.2		2110	2.2		2110	2.16		2110	2.23		2110	2.25		2111	2.14		2110	2.21		2109	2.19		2110	2.1		2110	2.2		2110	2.21		2110	2.14		2110	2.15		2110	2.16		2110	2.06		2110
	2120	2.21		2120	2.2		2120	2.2		2120	2.16		2120	2.23		2120	2.25		2121	2.14		2120	2.21		2120	2.19		2120	2.1		2120	2.2		2120	2.21		2121	2.14		2121	2.15		2121	2.16		2120	2.06		2120
	2130	2.21		2130	2.2		2130	2.2		2130	2.16		2130	2.23		2130	2.24		2131	2.14		2130	2.21		2130	2.19		2130	2.1		2130	2.2		2131	2.21		2131	2.14		2131	2.15		2131	2.16		2131	2.06		2130
	2140	2.21		2141	2.2		2140	2.2		2141	2.16		2141	2.23		2140	2.25		2141	2.14		2140	2.21		2140	2.19		2140	2.1		2140	2.2		2141	2.21		2141	2.14		2141	2.15		2141	2.16		2141	2.05		2140
	2150	2.21		2151	2.2		2151	2.2		2151	2.16		2151	2.23		2150	2.25		2151	2.14		2151	2.21		2150	2.19		2150	2.1		2150	2.2		2151	2.21		2151	2.14		2151	2.15		2151	2.16		2151	2.05		2151
	2160	2.21		2161	2.2		2161	2.2		2161	2.16		2161	2.23		2160	2.24		2161	2.14		2161	2.21		2160	2.19		2161	2.1		2160	2.2		2161	2.21		2161	2.14		2161	2.15		2161	2.16		2161	2.05		2161
	2170	2.21		2171	2.2		2171	2.2		2171	2.16		2171	2.23		2171	2.25		2171	2.14		2171	2.21		2170	2.19		2171	2.1		2171	2.2		2171	2.21		2171	2.14		2171	2.15		2171	2.16		2171	2.05		2171
	2181	2.21		2181	2.2		2181	2.2		2181	2.16		2181	2.23		2181	2.25		2182	2.14		2181	2.21		2180	2.19		2181	2.1		2181	2.2		2181	2.21		2181	2.14		2182	2.15		2181	2.16		2181	2.05		2181
	2191	2.21		2191	2.2		2191	2.2		2191	2.16		2191	2.23		2191	2.25		2192	2.14		2191	2.21		2191	2.19		2191	2.1		2191	2.2		2191	2.21		2192	2.14		2192	2.15		2192	2.16		2191	2.05		2191
	2201	2.21		2201	2.2		2201	2.2		2202	2.16		2201	2.23		2201	2.25		2202	2.14		2201	2.21		2201	2.19		2201	2.1		2201	2.2		2202	2.21		2202	2.14		2202	2.15		2202	2.15		2202	2.05		2201
	2211	2.21		2212	2.2		2211	2.2		2212	2.16		2212	2.23		2211	2.25		2212	2.14		2211	2.21		2211	2.19		2211	2.1		2211	2.2		2212	2.21		2212	2.14		2212	2.15		2212	2.15		2212	2.05		2211
	2221	2.21		2222	2.2		2222	2.2		2222	2.16		2222	2.23		2221	2.25		2222	2.14		2222	2.21		2221	2.19		2221	2.1		2221	2.2		2222	2.21		2222	2.14		2222	2.15		2222	2.15		2222	2.05		2222
	2231	2.21		2232	2.2		2232	2.2		2232	2.16		2232	2.23		2231	2.24		2232	2.14		2232	2.2		2231	2.19		2232	2.1		2231	2.2		2232	2.21		2232	2.14		2232	2.15		2232	2.15		2232	2.05		2232
	2241	2.21		2242	2.2		2242	2.2		2242	2.16		2242	2.23		2242	2.25		2243	2.14		2242	2.2		2241	2.19		2242	2.1		2242	2.2		2242	2.21		2242	2.14		2242	2.15		2242	2.15		2242	2.05		2242
	2252	2.21		2252	2.2		2252	2.2		2252	2.16		2252	2.23		2252	2.25		2253	2.14		2252	2.2		2251	2.19		2252	2.1		2252	2.2		2252	2.21		2252	2.14		2253	2.15		2252	2.15		2252	2.05		2252
	2262	2.21		2262	2.2		2262	2.2		2262	2.16		2262	2.23		2262	2.25		2263	2.14		2262	2.2		2262	2.19		2262	2.1		2262	2.2		2262	2.21		2263	2.14		2263	2.15		2263	2.15		2262	2.05		2262
	2272	2.21		2272	2.2		2272	2.2		2273	2.16		2272	2.23		2272	2.24		2273	2.14		2272	2.2		2272	2.19		2272	2.1		2272	2.2		2273	2.21		2273	2.14		2273	2.15		2273	2.15		2273	2.05		2272
	2282	2.21		2283	2.2		2282	2.2		2283	2.16		2283	2.23		2282	2.24		2283	2.14		2282	2.2		2282	2.19		2282	2.1		2282	2.2		2283	2.21		2283	2.14		2283	2.15		2283	2.15		2283	2.05		2282
	2292	2.21		2293	2.2		2293	2.2		2293	2.16		2293	2.23		2292	2.24		2293	2.14		2293	2.2		2292	2.19		2292	2.1		2292	2.2		2293	2.21		2293	2.14		2293	2.15		2293	2.15		2293	2.05		2293
	2302	2.21		2303	2.2		2303	2.2		2303	2.16		2303	2.23		2302	2.25		2303	2.14		2303	2.2		2302	2.19		2303	2.1		2303	2.2		2303	2.21		2303	2.14		2303	2.15		2303	2.15		2303	2.05		2303
	2312	2.21		2313	2.2		2313	2.2		2313	2.16		2313	2.23		2313	2.24		2314	2.14		2313	2.2		2312	2.19		2313	2.1		2313	2.2		2313	2.21		2313	2.14		2313	2.15		2313	2.15		2313	2.05		2313
	2323	2.21		2323	2.2		2323	2.2		2323	2.16		2323	2.23		2323	2.24		2324	2.14		2323	2.2		2322	2.19		2323	2.1		2323	2.2		2323	2.21		2324	2.14		2324	2.15		2323	2.15		2323	2.04		2323
	2333	2.21		2333	2.2		2333	2.2		2333	2.16		2333	2.23		2333	2.24		2334	2.14		2333	2.2		2333	2.19		2333	2.1		2333	2.2		2333	2.21		2334	2.14		2334	2.15		2334	2.15		2334	2.04		2333
	2343	2.21		2343	2.2		2343	2.2		2344	2.16		2343	2.23		2343	2.24		2344	2.14		2343	2.2		2343	2.19		2343	2.1		2343	2.2		2344	2.21		2344	2.14		2344	2.15		2344	2.15		2344	2.04		2343
	2353	2.21		2354	2.2		2353	2.2		2354	2.16		2354	2.23		2353	2.24		2354	2.14		2353	2.2		2353	2.19		2353	2.1		2353	2.19		2354	2.21		2354	2.14		2354	2.15		2354	2.15		2354	2.04		2353
	2363	2.21		2364	2.2		2364	2.2		2364	2.16		2364	2.23		2363	2.25		2364	2.14		2364	2.2		2363	2.19		2363	2.1		2363	2.2		2364	2.21		2364	2.14		2364	2.15		2364	2.15		2364	2.04		2364
	2373	2.21		2374	2.2		2374	2.2		2374	2.16		2374	2.23		2373	2.24		2374	2.14		2374	2.2		2373	2.19		2374	2.1		2374	2.2		2374	2.21		2374	2.14		2374	2.15		2374	2.15		2374	2.04		2374
	2383	2.21		2384	2.2		2384	2.2		2384	2.16		2384	2.23		2384	2.24		2385	2.14		2384	2.2		2383	2.19		2384	2.1		2384	2.19		2384	2.21		2384	2.14		2384	2.15		2384	2.15		2384	2.04		2384
	2394	2.21		2394	2.2		2394	2.2		2394	2.16		2394	2.23		2394	2.25		2395	2.14		2394	2.2		2393	2.19		2394	2.1		2394	2.19		2394	2.21		2394	2.14		2395	2.15		2394	2.15		2394	2.04		2394
	2404	2.21		2404	2.2		2404	2.2		2404	2.16		2404	2.23		2404	2.25		2405	2.14		2404	2.2		2404	2.19		2404	2.1		2404	2.19		2404	2.21		2405	2.14		2405	2.14		2405	2.15		2405	2.04		2404
	2414	2.21		2414	2.2		2414	2.2		2415	2.16		2415	2.23		2414	2.24		2415	2.14		2414	2.2		2414	2.19		2414	2.09		2414	2.19		2415	2.21		2415	2.14		2415	2.14		2415	2.15		2415	2.04		2414
	2424	2.21		2425	2.2		2424	2.2		2425	2.16		2425	2.23		2424	2.24		2425	2.14		2424	2.2		2424	2.19		2424	2.09		2424	2.19		2425	2.21		2425	2.14		2425	2.14		2425	2.15		2425	2.04		2425
	2434	2.21		2435	2.2		2435	2.2		2435	2.16		2435	2.23		2434	2.24		2435	2.14		2435	2.2		2434	2.19		2434	2.09		2434	2.19		2435	2.21		2435	2.14		2435	2.14		2435	2.15		2435	2.04		2435
	2444	2.21		2445	2.2		2445	2.2		2445	2.16		2445	2.23		2444	2.24		2445	2.14		2445	2.2		2444	2.19		2445	2.09		2445	2.19		2445	2.21		2445	2.14		2445	2.14		2445	2.15		2445	2.04		2445
	2454	2.21		2455	2.2		2455	2.2		2455	2.16		2455	2.23		2455	2.24		2456	2.14		2455	2.2		2454	2.19		2455	2.09		2455	2.19		2455	2.21		2455	2.14		2455	2.14		2455	2.15		2455	2.04		2455
	2465	2.21		2465	2.2		2465	2.2		2465	2.16		2465	2.23		2465	2.24		2466	2.14		2465	2.2		2464	2.19		2465	2.09		2465	2.19		2465	2.21		2465	2.13		2466	2.14		2465	2.15		2465	2.04		2465
	2475	2.21		2475	2.2		2475	2.2		2475	2.16		2475	2.23		2475	2.25		2476	2.14		2475	2.2		2475	2.19		2475	2.09		2475	2.19		2475	2.21		2476	2.13		2476	2.14		2476	2.15		2476	2.04		2475
	2485	2.21		2485	2.2		2485	2.2		2486	2.16		2486	2.23		2485	2.24		2486	2.14		2485	2.2		2485	2.19		2485	2.09		2485	2.19		2486	2.21		2486	2.13		2486	2.14		2486	2.15		2486	2.04		2485
	2495	2.21		2496	2.2		2495	2.19		2496	2.16		2496	2.23		2495	2.25		2496	2.14		2495	2.2		2495	2.19		2495	2.09		2495	2.19		2496	2.21		2496	2.13		2496	2.14		2496	2.15		2496	2.04		2495
	2505	2.21		2506	2.2		2506	2.2		2506	2.16		2506	2.23		2505	2.25		2506	2.14		2506	2.2		2505	2.19		2505	2.09		2505	2.19		2506	2.21		2506	2.13		2506	2.14		2506	2.15		2506	2.04		2506
	2515	2.21		2516	2.2		2516	2.19		2516	2.16		2516	2.23		2515	2.24		2516	2.14		2516	2.2		2515	2.19		2516	2.09		2516	2.19		2516	2.21		2516	2.13		2516	2.14		2516	2.14		2516	2.03		2516
	2525	2.21		2526	2.2		2526	2.19		2526	2.16		2526	2.23		2526	2.25		2527	2.14		2526	2.2		2525	2.19		2526	2.09		2526	2.19		2526	2.21		2526	2.13		2526	2.14		2526	2.14		2526	2.03		2526
	2536	2.21		2536	2.2		2536	2.19		2536	2.16		2536	2.23		2536	2.24		2537	2.14		2536	2.2		2535	2.19		2536	2.09		2536	2.19		2536	2.21		2537	2.13		2537	2.14		2536	2.14		2536	2.03		2536
	2546	2.21		2546	2.2		2546	2.19		2546	2.16		2546	2.23		2546	2.25		2547	2.14		2546	2.2		2546	2.19		2546	2.09		2546	2.19		2546	2.21		2547	2.13		2547	2.14		2547	2.14		2547	2.03		2546
	2556	2.21		2556	2.2		2556	2.2		2557	2.16		2556	2.23		2556	2.24		2557	2.14		2556	2.2		2556	2.19		2556	2.09		2556	2.19		2557	2.21		2557	2.13		2557	2.14		2557	2.14		2557	2.03		2556
	2566	2.21		2567	2.2		2566	2.19		2567	2.16		2567	2.23		2566	2.24		2567	2.14		2566	2.2		2566	2.19		2566	2.09		2566	2.19		2567	2.21		2567	2.13		2567	2.14		2567	2.14		2567	2.03		2566
	2576	2.2		2577	2.2		2577	2.19		2577	2.16		2577	2.23		2576	2.24		2577	2.14		2577	2.2		2576	2.19		2576	2.09		2576	2.19		2577	2.21		2577	2.13		2577	2.14		2577	2.14		2577	2.03		2577
	2586	2.2		2587	2.2		2587	2.19		2587	2.16		2587	2.23		2586	2.24		2587	2.14		2587	2.2		2586	2.19		2587	2.09		2587	2.19		2587	2.21		2587	2.13		2587	2.14		2587	2.14		2587	2.03		2587
	2596	2.2		2597	2.2		2597	2.19		2597	2.16		2597	2.23		2597	2.24		2598	2.14		2597	2.2		2596	2.19		2597	2.09		2597	2.19		2597	2.21		2597	2.13		2597	2.14		2597	2.14		2597	2.03		2597
	2607	2.2		2607	2.2		2607	2.19		2607	2.16		2607	2.23		2607	2.24		2608	2.14		2607	2.2		2607	2.19		2607	2.09		2607	2.19		2607	2.2		2608	2.13		2608	2.14		2607	2.14		2607	2.03		2607
	2617	2.2		2617	2.2		2617	2.19		2617	2.16		2617	2.23		2617	2.24		2618	2.14		2617	2.2		2617	2.19		2617	2.09		2617	2.19		2617	2.2		2618	2.13		2618	2.14		2618	2.14		2618	2.03		2617
	2627	2.2		2627	2.2		2627	2.19		2628	2.16		2628	2.23		2627	2.24		2628	2.14		2627	2.2		2627	2.19		2627	2.09		2627	2.19		2628	2.2		2628	2.13		2628	2.14		2628	2.14		2628	2.03		2627
	2637	2.2		2638	2.2		2637	2.19		2638	2.16		2638	2.23		2637	2.25		2638	2.14		2638	2.2		2637	2.19		2637	2.09		2637	2.19		2638	2.2		2638	2.13		2638	2.14		2638	2.14		2638	2.03		2638
	2647	2.2		2648	2.2		2648	2.19		2648	2.16		2648	2.23		2647	2.24		2648	2.14		2648	2.2		2647	2.19		2648	2.09		2647	2.19		2648	2.2		2648	2.13		2648	2.14		2648	2.14		2648	2.03		2648
	2657	2.2		2658	2.2		2658	2.19		2658	2.16		2658	2.23		2657	2.24		2658	2.13		2658	2.2		2657	2.19		2658	2.09		2658	2.19		2658	2.2		2658	2.13		2658	2.14		2658	2.14		2658	2.03		2658
	2667	2.2		2668	2.2		2668	2.19		2668	2.16		2668	2.23		2668	2.24		2669	2.13		2668	2.2		2667	2.19		2668	2.09		2668	2.19		2668	2.2		2668	2.13		2668	2.14		2668	2.14		2668	2.03		2668
	2678	2.2		2678	2.19		2678	2.19		2678	2.16		2678	2.23		2678	2.24		2679	2.13		2678	2.2		2678	2.19		2678	2.09		2678	2.19		2678	2.2		2679	2.13		2679	2.14		2678	2.14		2678	2.03		2678
	2688	2.2		2688	2.19		2688	2.19		2688	2.15		2688	2.23		2688	2.24		2689	2.13		2688	2.2		2688	2.19		2688	2.09		2688	2.19		2688	2.2		2689	2.13		2689	2.14		2689	2.14		2689	2.03		2688
	2698	2.2		2698	2.19		2698	2.19		2699	2.15		2699	2.23		2698	2.24		2699	2.13		2698	2.2		2698	2.19		2698	2.09		2698	2.19		2699	2.2		2699	2.13		2699	2.14		2699	2.14		2699	2.03		2698
	2708	2.2		2709	2.19		2708	2.19		2709	2.15		2709	2.23		2708	2.24		2709	2.13		2708	2.2		2708	2.19		2708	2.09		2708	2.19		2709	2.2		2709	2.13		2709	2.14		2709	2.14		2709	2.03		2709
	2718	2.2		2719	2.19		2719	2.19		2719	2.15		2719	2.23		2718	2.24		2719	2.13		2719	2.2		2718	2.19		2719	2.09		2718	2.19		2719	2.2		2719	2.13		2719	2.14		2719	2.14		2719	2.02		2719
	2728	2.2		2729	2.19		2729	2.19		2729	2.15		2729	2.23		2728	2.24		2729	2.13		2729	2.2		2728	2.19		2729	2.09		2729	2.19		2729	2.2		2729	2.13		2729	2.14		2729	2.14		2729	2.02		2729
	2739	2.2		2739	2.19		2739	2.19		2739	2.15		2739	2.23		2739	2.24		2740	2.13		2739	2.2		2738	2.19		2739	2.09		2739	2.19		2739	2.2		2739	2.13		2739	2.14		2739	2.14		2739	2.02		2739
	2749	2.2		2749	2.19		2749	2.19		2749	2.15		2749	2.23		2749	2.24		2750	2.13		2749	2.2		2749	2.19		2749	2.09		2749	2.19		2749	2.2		2750	2.13		2750	2.13		2749	2.14		2749	2.02		2749
	2759	2.2		2759	2.19		2759	2.19		2759	2.15		2759	2.23		2759	2.24		2760	2.13		2759	2.2		2759	2.19		2759	2.08		2759	2.19		2759	2.2		2760	2.13		2760	2.13		2760	2.14		2760	2.02		2759
	2769	2.2		2769	2.19		2769	2.19		2770	2.15		2770	2.23		2769	2.25		2770	2.13		2769	2.2		2769	2.19		2769	2.08		2769	2.19		2770	2.2		2770	2.13		2770	2.13		2770	2.14		2770	2.02		2769
	2779	2.2		2780	2.19		2779	2.19		2780	2.15		2780	2.23		2779	2.24		2780	2.13		2780	2.2		2779	2.19		2779	2.08		2779	2.19		2780	2.2		2780	2.13		2780	2.13		2780	2.14		2780	2.02		2780
	2789	2.2		2790	2.19		2790	2.19		2790	2.15		2790	2.23		2789	2.25		2790	2.13		2790	2.2		2789	2.19		2790	2.08		2789	2.19		2790	2.2		2790	2.13		2790	2.13		2790	2.14		2790	2.02		2790
	2799	2.2		2800	2.19		2800	2.19		2800	2.15		2800	2.23		2799	2.24		2800	2.13		2800	2.2		2799	2.19		2800	2.08		2800	2.19		2800	2.2		2800	2.13		2800	2.13		2800	2.14		2800	2.02		2800
	2810	2.2		2810	2.19		2810	2.19		2810	2.15		2810	2.23		2810	2.25		2811	2.13		2810	2.2		2809	2.19		2810	2.08		2810	2.19		2810	2.2		2810	2.13		2810	2.13		2810	2.14		2810	2.02		2810
	2820	2.2		2820	2.19		2820	2.19		2820	2.15		2820	2.23		2820	2.24		2821	2.13		2820	2.2		2820	2.19		2820	2.08		2820	2.19		2820	2.2		2821	2.13		2821	2.13		2820	2.14		2820	2.02		2820
	2830	2.2		2830	2.19		2830	2.19		2830	2.15		2830	2.23		2830	2.25		2831	2.13		2830	2.2		2830	2.19		2830	2.08		2830	2.19		2831	2.2		2831	2.13		2831	2.13		2831	2.14		2831	2.02		2830
	2840	2.2		2840	2.19		2840	2.19		2841	2.15		2841	2.23		2840	2.24		2841	2.13		2840	2.2		2840	2.19		2840	2.08		2840	2.19		2841	2.2		2841	2.13		2841	2.13		2841	2.14		2841	2.02		2840
	2850	2.2		2851	2.19		2850	2.19		2851	2.15		2851	2.23		2850	2.24		2851	2.13		2851	2.2		2850	2.19		2850	2.08		2850	2.19		2851	2.2		2851	2.13		2851	2.13		2851	2.14		2851	2.02		2851
	2860	2.2		2861	2.19		2861	2.19		2861	2.15		2861	2.23		2860	2.25		2861	2.13		2861	2.2		2860	2.19		2861	2.08		2860	2.18		2861	2.2		2861	2.13		2861	2.13		2861	2.14		2861	2.02		2861
	2870	2.2		2871	2.19		2871	2.19		2871	2.15		2871	2.23		2870	2.24		2871	2.13		2871	2.2		2870	2.19		2871	2.08		2871	2.18		2871	2.2		2871	2.13		2871	2.13		2871	2.13		2871	2.02		2871
	2881	2.2		2881	2.19		2881	2.19		2881	2.15		2881	2.23		2881	2.24		2882	2.13		2881	2.2		2880	2.19		2881	2.08		2881	2.18		2881	2.2		2881	2.13		2881	2.13		2881	2.13		2881	2.02		2881
	2891	2.2		2891	2.19		2891	2.19		2891	2.15		2891	2.23		2891	2.24		2892	2.13		2891	2.2		2891	2.19		2891	2.08		2891	2.18		2891	2.2		2892	2.12		2892	2.13		2891	2.13		2891	2.02		2891
	2901	2.2		2901	2.19		2901	2.19		2901	2.15		2901	2.23		2901	2.25		2902	2.13		2901	2.2		2901	2.19		2901	2.08		2901	2.18		2902	2.2		2902	2.12		2902	2.13		2902	2.13		2902	2.02		2901
	2911	2.2		2911	2.19		2911	2.19		2912	2.15		2912	2.23		2911	2.24		2912	2.13		2911	2.2		2911	2.19		2911	2.08		2911	2.18		2912	2.2		2912	2.12		2912	2.13		2912	2.13		2912	2.02		2911
	2921	2.2		2922	2.19		2921	2.19		2922	2.15		2922	2.23		2921	2.24		2922	2.13		2922	2.2		2921	2.19		2921	2.08		2921	2.18		2922	2.2		2922	2.12		2922	2.13		2922	2.13		2922	2.02		2922
	2931	2.2		2932	2.19		2932	2.19		2932	2.15		2932	2.23		2931	2.24		2932	2.13		2932	2.2		2931	2.19		2932	2.08		2931	2.18		2932	2.2		2932	2.12		2932	2.13		2932	2.13		2932	2.02		2932
	2941	2.2		2942	2.19		2942	2.19		2942	2.15		2942	2.23		2941	2.24		2942	2.13		2942	2.2		2941	2.19		2942	2.08		2942	2.18		2942	2.2		2942	2.12		2942	2.13		2942	2.13		2942	2.01		2942
	2952	2.2		2952	2.19		2952	2.19		2952	2.15		2952	2.23		2952	2.24		2953	2.13		2952	2.2		2951	2.19		2952	2.08		2952	2.18		2952	2.2		2952	2.12		2953	2.13		2953	2.13		2952	2.01		2952
	2962	2.2		2962	2.19		2962	2.19		2962	2.15		2962	2.23		2962	2.24		2963	2.13		2962	2.2		2962	2.19		2962	2.08		2962	2.18		2962	2.2		2963	2.12		2963	2.13		2963	2.13		2963	2.01		2962
	2972	2.2		2972	2.19		2972	2.19		2973	2.15		2973	2.23		2972	2.24		2973	2.13		2972	2.2		2972	2.19		2972	2.08		2972	2.18		2973	2.2		2973	2.12		2973	2.13		2973	2.13		2973	2.01		2972
	2982	2.2		2982	2.19		2982	2.19		2983	2.15		2983	2.23		2982	2.25		2983	2.13		2982	2.2		2982	2.19		2982	2.08		2982	2.18		2983	2.2		2983	2.12		2983	2.13		2983	2.13		2983	2.01		2982
	2992	2.2		2993	2.19		2992	2.19		2993	2.15		2993	2.23		2992	2.24		2993	2.13		2993	2.2		2992	2.19		2992	2.08		2992	2.18		2993	2.2		2993	2.12		2993	2.13		2993	2.13		2993	2.01		2993
	3002	2.2		3003	2.19		3003	2.19		3003	2.15		3003	2.23		3002	2.24		3003	2.13		3003	2.19		3002	2.19		3003	2.08		3002	2.18		3003	2.2		3003	2.12		3003	2.13		3003	2.13		3003	2.01		3003
	3012	2.2		3013	2.19		3013	2.19		3013	2.15		3013	2.23		3012	2.25		3013	2.13		3013	2.2		3012	2.19		3013	2.08		3013	2.18		3013	2.2		3013	2.12		3013	2.13		3013	2.13		3013	2.01		3013
	3023	2.2		3023	2.19		3023	2.19		3023	2.15		3023	2.23		3023	2.25		3024	2.13		3023	2.19		3022	2.19		3023	2.08		3023	2.18		3023	2.2		3023	2.12		3024	2.13		3024	2.13		3023	2.01		3023
	3033	2.2		3033	2.19		3033	2.19		3033	2.15		3033	2.23		3033	2.24		3034	2.13		3033	2.19		3033	2.19		3033	2.08		3033	2.18		3033	2.2		3034	2.12		3034	2.13		3034	2.13		3034	2.01		3033
	3043	2.2		3043	2.19		3043	2.19		3044	2.15		3043	2.23		3043	2.24		3044	2.13		3043	2.19		3043	2.19		3043	2.08		3043	2.18		3044	2.2		3044	2.12		3044	2.13		3044	2.13		3044	2.01		3043
	3053	2.2		3053	2.19		3053	2.19		3054	2.15		3054	2.23		3053	2.24		3054	2.13		3053	2.19		3053	2.18		3053	2.08		3053	2.18		3054	2.2		3054	2.12		3054	2.13		3054	2.13		3054	2.01		3053
	3063	2.2		3064	2.19		3063	2.19		3064	2.15		3064	2.23		3063	2.24		3064	2.13		3064	2.19		3063	2.18		3063	2.08		3063	2.18		3064	2.2		3064	2.12		3064	2.13		3064	2.13		3064	2.01		3064
	3073	2.2		3074	2.19		3074	2.19		3074	2.15		3074	2.23		3073	2.24		3074	2.13		3074	2.19		3073	2.18		3074	2.08		3073	2.18		3074	2.2		3074	2.12		3074	2.13		3074	2.13		3074	2.01		3074
	3083	2.2		3084	2.19		3084	2.19		3084	2.15		3084	2.23		3083	2.24		3085	2.13		3084	2.19		3083	2.18		3084	2.08		3084	2.18		3084	2.2		3084	2.12		3084	2.13		3084	2.13		3084	2.01		3084
	3094	2.2		3094	2.19		3094	2.19		3094	2.15		3094	2.23		3094	2.24		3095	2.13		3094	2.19		3093	2.18		3094	2.08		3094	2.18		3094	2.2		3094	2.12		3095	2.13		3095	2.13		3094	2.01		3094
	3104	2.2		3104	2.19		3104	2.19		3104	2.15		3104	2.23		3104	2.24		3105	2.13		3104	2.19		3104	2.18		3104	2.07		3104	2.18		3104	2.2		3105	2.12		3105	2.13		3105	2.13		3105	2.01		3104
	3114	2.2		3114	2.19		3114	2.19		3115	2.15		3114	2.23		3114	2.24		3115	2.13		3114	2.19		3114	2.18		3114	2.07		3114	2.18		3115	2.2		3115	2.12		3115	2.13		3115	2.13		3115	2.01		3114
	3124	2.2		3124	2.19		3124	2.19		3125	2.15		3125	2.23		3124	2.24		3125	2.13		3124	2.19		3124	2.18		3124	2.07		3124	2.18		3125	2.2		3125	2.12		3125	2.13		3125	2.13		3125	2.01		3124
	3134	2.2		3135	2.19		3134	2.19		3135	2.15		3135	2.23		3134	2.24		3135	2.13		3135	2.19		3134	2.18		3135	2.07		3134	2.18		3135	2.2		3135	2.12		3135	2.13		3135	2.13		3135	2.01		3135
	3144	2.2		3145	2.19		3145	2.19		3145	2.15		3145	2.23		3144	2.24		3145	2.13		3145	2.19		3144	2.18		3145	2.07		3144	2.18		3145	2.2		3145	2.12		3145	2.12		3145	2.13		3145	2.01		3145
	3154	2.2		3155	2.19		3155	2.19		3155	2.15		3155	2.23		3154	2.24		3156	2.13		3155	2.19		3154	2.18		3155	2.07		3155	2.18		3155	2.2		3155	2.12		3155	2.12		3155	2.13		3155	2.01		3155
	3165	2.2		3165	2.19		3165	2.19		3165	2.15		3165	2.23		3165	2.24		3166	2.13		3165	2.19		3164	2.18		3165	2.07		3165	2.18		3165	2.2		3165	2.12		3166	2.12		3165	2.13		3165	2.01		3165
	3175	2.2		3175	2.19		3175	2.19		3175	2.15		3175	2.23		3175	2.24		3176	2.13		3175	2.19		3175	2.18		3175	2.07		3175	2.18		3175	2.2		3176	2.12		3176	2.12		3176	2.13		3176	2		3175
	3185	2.2		3185	2.19		3185	2.19		3186	2.15		3185	2.23		3185	2.24		3186	2.13		3185	2.19		3185	2.18		3185	2.07		3185	2.18		3186	2.2		3186	2.12		3186	2.12		3186	2.13		3186	2		3185
	3195	2.2		3195	2.19		3195	2.19		3196	2.15		3196	2.23		3195	2.24		3196	2.13		3195	2.19		3195	2.18		3195	2.07		3195	2.18		3196	2.2		3196	2.12		3196	2.12		3196	2.13		3196	2		3195
	3205	2.2		3206	2.19		3205	2.19		3206	2.15		3206	2.23		3205	2.24		3206	2.13		3206	2.19		3205	2.18		3206	2.07		3205	2.18		3206	2.2		3206	2.12		3206	2.12		3206	2.13		3206	2		3206
	3215	2.2		3216	2.19		3216	2.19		3216	2.15		3216	2.23		3215	2.24		3216	2.13		3216	2.19		3215	2.18		3216	2.07		3216	2.18		3216	2.2		3216	2.12		3216	2.12		3216	2.13		3216	2		3216
	3225	2.2		3226	2.19		3226	2.19		3226	2.15		3226	2.23		3225	2.24		3227	2.13		3226	2.19		3225	2.18		3226	2.07		3226	2.18		3226	2.2		3226	2.12		3226	2.12		3226	2.13		3226	2		3226
	3236	2.2		3236	2.19		3236	2.19		3236	2.15		3236	2.23		3236	2.24		3237	2.13		3236	2.19		3235	2.18		3236	2.07		3236	2.18		3236	2.2		3236	2.12		3236	2.12		3237	2.13		3236	2		3236
	3246	2.2		3246	2.19		3246	2.19		3246	2.15		3246	2.23		3246	2.24		3247	2.13		3246	2.19		3246	2.18		3246	2.07		3246	2.18		3247	2.2		3247	2.12		3247	2.12		3247	2.13		3247	2		3246
	3256	2.2		3256	2.19		3256	2.19		3257	2.15		3257	2.23		3256	2.24		3257	2.13		3256	2.19		3256	2.18		3256	2.07		3256	2.18		3257	2.2		3257	2.12		3257	2.12		3257	2.13		3257	2		3256
	3266	2.2		3266	2.19		3266	2.19		3267	2.15		3267	2.23		3266	2.24		3267	2.13		3266	2.19		3266	2.18		3266	2.07		3266	2.18		3267	2.2		3267	2.12		3267	2.12		3267	2.13		3267	2		3266
	3276	2.2		3277	2.19		3276	2.19		3277	2.15		3277	2.23		3276	2.24		3277	2.13		3277	2.19		3276	2.18		3277	2.07		3276	2.18		3277	2.2		3277	2.12		3277	2.12		3277	2.13		3277	2		3277
	3286	2.2		3287	2.19		3287	2.19		3287	2.15		3287	2.23		3286	2.24		3287	2.13		3287	2.19		3286	2.18		3287	2.07		3286	2.17		3287	2.2		3287	2.12		3287	2.12		3287	2.13		3287	2		3287
	3296	2.2		3297	2.19		3297	2.19		3297	2.15		3297	2.23		3296	2.24		3298	2.13		3297	2.19		3296	2.18		3297	2.07		3297	2.17		3297	2.2		3297	2.12		3297	2.12		3297	2.13		3297	2		3297
	3307	2.2		3307	2.19		3307	2.19		3307	2.15		3307	2.23		3307	2.24		3308	2.13		3307	2.19		3306	2.18		3307	2.07		3307	2.17		3307	2.2		3308	2.12		3308	2.12		3308	2.13		3308	2		3307
	3317	2.2		3317	2.19		3317	2.19		3318	2.15		3317	2.23		3317	2.24		3318	2.13		3317	2.19		3317	2.18		3317	2.07		3317	2.17		3318	2.2		3318	2.12		3318	2.12		3318	2.13		3318	2		3317
	3327	2.2		3327	2.19		3327	2.19		3328	2.15		3327	2.23		3327	2.24		3328	2.13		3327	2.19		3327	2.18		3327	2.07		3327	2.17		3328	2.2		3328	2.12		3328	2.12		3328	2.13		3328	2		3327
	3337	2.2		3337	2.19		3337	2.19		3338	2.15		3338	2.23		3337	2.24		3338	2.13		3337	2.19		3337	2.18		3337	2.07		3337	2.17		3338	2.2		3338	2.12		3338	2.12		3338	2.12		3338	2		3337
	3347	2.2		3348	2.19		3347	2.19		3348	2.15		3348	2.23		3347	2.24		3348	2.13		3348	2.19		3347	2.18		3348	2.07		3347	2.17		3348	2.2		3348	2.12		3348	2.12		3348	2.12		3348	2		3348
	3357	2.2		3358	2.19		3358	2.19		3358	2.15		3358	2.23		3357	2.24		3358	2.13		3358	2.19		3357	2.18		3358	2.07		3357	2.17		3358	2.2		3358	2.12		3358	2.12		3358	2.12		3358	2		3358
	3367	2.2		3368	2.19		3368	2.19		3368	2.15		3368	2.23		3367	2.24		3369	2.13		3368	2.19		3367	2.18		3368	2.07		3368	2.17		3368	2.2		3368	2.12		3368	2.12		3368	2.12		3368	2		3368
	3378	2.2		3378	2.19		3378	2.19		3378	2.15		3378	2.23		3378	2.24		3379	2.13		3378	2.19		3377	2.18		3378	2.07		3378	2.17		3378	2.2		3379	2.12		3379	2.12		3379	2.12		3379	2		3378
	3388	2.2		3388	2.19		3388	2.19		3389	2.15		3388	2.23		3388	2.24		3389	2.13		3388	2.19		3388	2.18		3388	2.07		3388	2.17		3389	2.2		3389	2.12		3389	2.12		3389	2.12		3389	2		3388
	3398	2.2		3398	2.19		3398	2.19		3399	2.15		3399	2.23		3398	2.24		3399	2.13		3398	2.19		3398	2.18		3398	2.07		3398	2.17		3399	2.19		3399	2.12		3399	2.12		3399	2.12		3399	1.99		3398
	3408	2.2		3408	2.19		3408	2.19		3409	2.15		3409	2.23		3408	2.24		3409	2.13		3408	2.19		3408	2.18		3408	2.07		3408	2.17		3409	2.2		3409	2.12		3409	2.12		3409	2.12		3409	1.99		3408
	3418	2.2		3419	2.19		3419	2.19		3419	2.15		3419	2.23		3418	2.24		3419	2.13		3419	2.19		3418	2.18		3419	2.07		3418	2.17		3419	2.19		3419	2.11		3419	2.12		3419	2.12		3419	1.99		3419
	3428	2.2		3429	2.19		3429	2.19		3429	2.15		3429	2.23		3428	2.24		3429	2.13		3429	2.19		3428	2.18		3429	2.07		3429	2.17		3429	2.19		3429	2.11		3429	2.12		3429	2.12		3429	1.99		3429
	3438	2.2		3439	2.19		3439	2.19		3439	2.14		3439	2.23		3438	2.24		3440	2.13		3439	2.19		3438	2.18		3439	2.07		3439	2.17		3439	2.19		3439	2.11		3440	2.12		3439	2.12		3439	1.99		3439
	3449	2.2		3449	2.19		3449	2.19		3449	2.14		3449	2.23		3449	2.24		3450	2.13		3449	2.19		3448	2.18		3449	2.07		3449	2.17		3449	2.19		3450	2.11		3450	2.12		3450	2.12		3450	1.99		3449
	3459	2.2		3459	2.19		3459	2.19		3460	2.14		3459	2.23		3459	2.24		3460	2.13		3459	2.19		3459	2.18		3459	2.07		3459	2.17		3460	2.19		3460	2.11		3460	2.12		3460	2.12		3460	1.99		3459
	3469	2.2		3469	2.19		3469	2.19		3470	2.14		3470	2.23		3469	2.24		3470	2.13		3469	2.19		3469	2.18		3469	2.07		3469	2.17		3470	2.19		3470	2.11		3470	2.12		3470	2.12		3470	1.99		3469
	3479	2.2		3479	2.19		3479	2.19		3480	2.14		3480	2.23		3479	2.24		3480	2.13		3479	2.19		3479	2.18		3480	2.06		3479	2.17		3480	2.19		3480	2.11		3480	2.12		3480	2.12		3480	1.99		3479
	3489	2.2		3490	2.19		3490	2.19		3490	2.14		3490	2.23		3489	2.24		3490	2.13		3490	2.19		3489	2.18		3490	2.07		3489	2.17		3490	2.19		3490	2.11		3490	2.12		3490	2.12		3490	1.99		3490
	3499	2.2		3500	2.19		3500	2.19		3500	2.14		3500	2.23		3499	2.24		3500	2.13		3500	2.19		3499	2.18		3500	2.06		3500	2.17		3500	2.19		3500	2.11		3500	2.12		3500	2.12		3500	1.99		3500
	3509	2.2		3510	2.19		3510	2.19		3510	2.14		3510	2.23		3509	2.24		3511	2.13		3510	2.19		3509	2.18		3510	2.06		3510	2.17		3510	2.19		3510	2.11		3511	2.12		3510	2.12		3510	1.99		3510
	3520	2.2		3520	2.19		3520	2.19		3520	2.14		3520	2.23		3520	2.24		3521	2.13		3520	2.19		3519	2.18		3520	2.06		3520	2.17		3520	2.19		3521	2.11		3521	2.12		3521	2.12		3521	1.99		3520
	3530	2.2		3530	2.19		3530	2.19		3531	2.14		3530	2.23		3530	2.24		3531	2.13		3530	2.19		3530	2.18		3530	2.06		3530	2.17		3531	2.19		3531	2.11		3531	2.12		3531	2.12		3531	1.99		3530
	3540	2.2		3540	2.19		3540	2.19		3541	2.14		3541	2.23		3540	2.24		3541	2.13		3540	2.19		3540	2.18		3540	2.06		3540	2.17		3541	2.19		3541	2.11		3541	2.12		3541	2.12		3541	1.99		3540
	3550	2.2		3551	2.19		3550	2.19		3551	2.14		3551	2.23		3550	2.24		3551	2.13		3550	2.19		3550	2.18		3551	2.06		3550	2.17		3551	2.19		3551	2.11		3551	2.12		3551	2.12		3551	1.99		3550
	3560	2.2		3561	2.19		3561	2.19		3561	2.14		3561	2.23		3560	2.24		3561	2.13		3561	2.19		3560	2.18		3561	2.06		3560	2.17		3561	2.19		3561	2.12		3561	2.11		3561	2.12		3561	1.99		3561
	3570	2.2		3571	2.19		3571	2.19		3571	2.14		3571	2.23		3570	2.24		3572	2.13		3571	2.19		3570	2.18		3571	2.06		3571	2.17		3571	2.19		3571	2.12		3571	2.11		3571	2.12		3571	1.99		3571
	3580	2.2		3581	2.19		3581	2.19		3581	2.14		3581	2.23		3581	2.24		3582	2.13		3581	2.19		3580	2.18		3581	2.06		3581	2.17		3581	2.19					3582	2.11		3581	2.12		3581	1.99		3581
	3591	2.2		3591	2.19		3591	2.19		3592	2.14		3591	2.23		3591	2.24		3592	2.13		3591	2.19		3590	2.18		3591	2.06		3591	2.17		3591	2.19					3592	2.11		3592	2.12		3592	1.99		3591
	3601	2.2		3601	2.19		3601	2.19					3601	2.23		3601	2.24		3602	2.13		3601	2.19		3601	2.18		3601	2.06		3601	2.17		3602	2.19					3602	2.11		3602	2.12		3602	1.99		3601
	3611	2.2		3612	2.19								3612	2.23		3611	2.24		3612	2.13		3611	2.19		3611	2.18		3611	2.06		3611	2.17		3612	2.19					3612	2.11		3612	2.12		3612	1.99		3611
	3621	2.2		3622	2.19								3622	2.23					3622	2.13		3621	2.19		3621	2.18					3621	2.17		3623	2.19					3622	2.11		3622	2.12		3622	1.99		3621
	3631	2.2											3632	2.23					3632	2.13		3632	2.19								3632	2.17								3632	2.11		3632	2.12		3632	1.99		3632
													3642	2.23					3643	2.12		3642	2.19								3642	2.17								3643	2.11					3642	1.99		3642
																			3653	2.12		3652	2.19								3652	2.17								3653	2.11					3653	1.98		3652
																			3663	2.12		3662	2.19								3662	2.17								3663	2.11								3662
																			3673	2.12		3672	2.19								3672	2.17								3673	2.11								3672
																			3683	2.12											3682	2.17								3683	2.11								3682
																			3693	2.12											3692	2.17																	3692
																			3703	2.12											3702	2.17																	3703
																			3714	2.12											3713	2.17																	3713
																			3724	2.12											3723	2.17																	3723
																			3734	2.12											3733	2.17																	3733
																			3744	2.12											3743	2.17																	3743
																			3754	2.12											3753	2.17																	3753
																			3764	2.12											3763	2.17																	3764
																			3774	2.12											3773	2.17																	3774
																			3785	2.12											3784	2.17																	3784
																			3795	2.12											3794	2.17																	3794
																			3805	2.12											3804	2.17																	3804
																			3815	2.12											3814	2.17																	3814
																			3825	2.12											3824	2.17																	3824
																			3835	2.12											3834	2.17																	3835
																			3845	2.12											3844	2.17																	3845
																			3856	2.12											3855	2.17																	3855
																			3866	2.12											3865	2.17																	3865
																			3876	2.12											3875	2.17																	3875
																			3886	2.12											3885	2.17																	3885
																			3896	2.12											3895	2.17																	3895
																			3906	2.12											3905	2.17																	3906
																			3916	2.12											3915	2.17																	3916
																			3927	2.12											3926	2.17																	3926
																			3937	2.12											3936	2.16																	3936
																			3947	2.12											3946	2.16																	3946
																			3957	2.12											3956	2.16																	3956
																			3967	2.12											3966	2.16																	3966
																			3977	2.12											3976	2.16																	3977
																															3986	2.16																	3987
																															3997	2.16																	3997
																															4007	2.16																	4007
																															4017	2.16																	4017
																															4027	2.16																	4027
																															4037	2.16																	4038
																															4047	2.16																	4048
																															4057	2.16																	4058
																															4068	2.16
																															4078	2.16
																															4088	2.16
																															4098	2.16
																															4108	2.16
																															4118	2.16
																															4129	2.16
																															4139	2.16
[truncated: 3 more columns]
